# Supplementary material for: A chemo- and regioselective C6-functionalization of 2,3-disubstituted indoles: highly efficient synthesis of diarylindol-6-ylmethanes
Source: Royal Society of Chemistry journal article supplement (doi:10.1039/c9ob00283a), 2019-01-01
Supplement: c9ob00283a1.pdf [file c9ob00283a1.pdf]

## *Supporting Information*

### **A chemo- and regioselective C6-functionalization of 2,3-disubstituted indoles: highly efficient synthesis of diarylindol-6-ylmethanes**

Qiong Wu,\* Gui-Lin Li, Shuang Yang, Xiao-Qin Shi, Tian-Zi Huang, Xi-Hua Du\*  
and Yan Chen\*

*School of Chemistry and Chemical Engineering, Xuzhou University of Technology, Xuzhou*

*221018, China. E-mail: [hgwuqiong@xzit.edu.cn](mailto:hgwuqiong@xzit.edu.cn).*

#### **Contents:**

- 1. NMR spectra of products 3 (S2-S23)**
- 2. HPLC spectra of product 3aa (S24)**
- 3. X-ray single crystal data for compound 3ae (S25-S26)**

# 1.NMR spectra of products 3

## <sup>1</sup>H NMR of compound 3aa

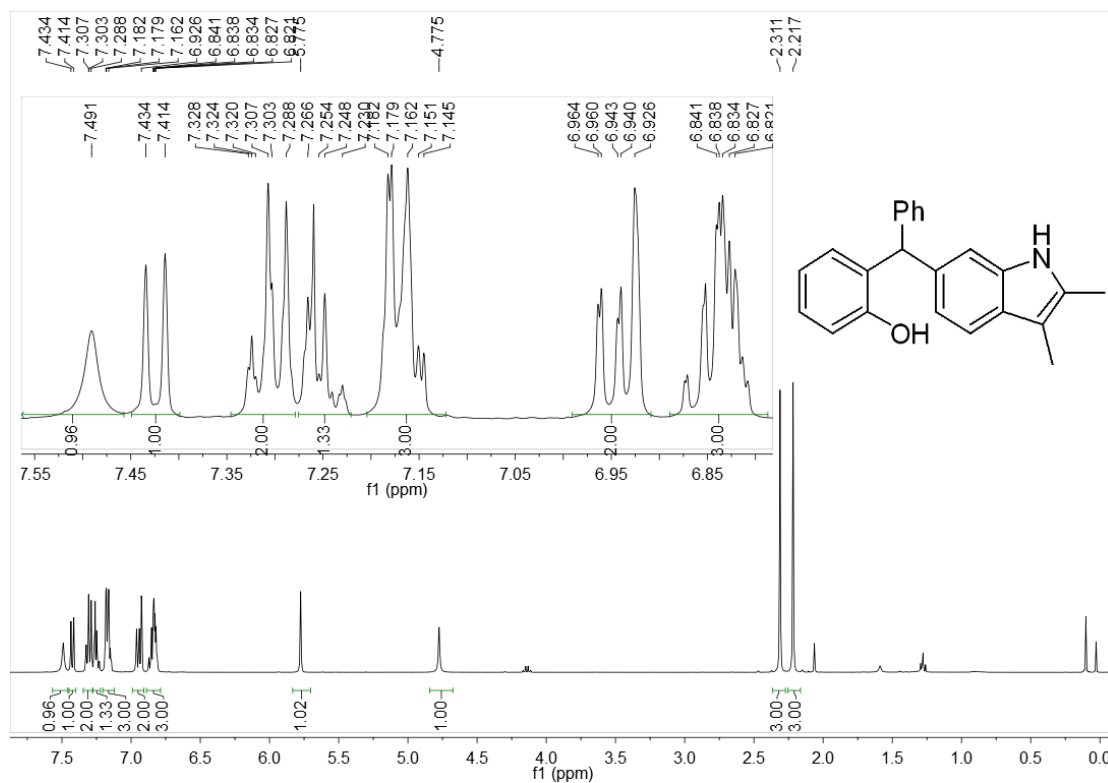

## <sup>13</sup>C NMR of compound 3aa

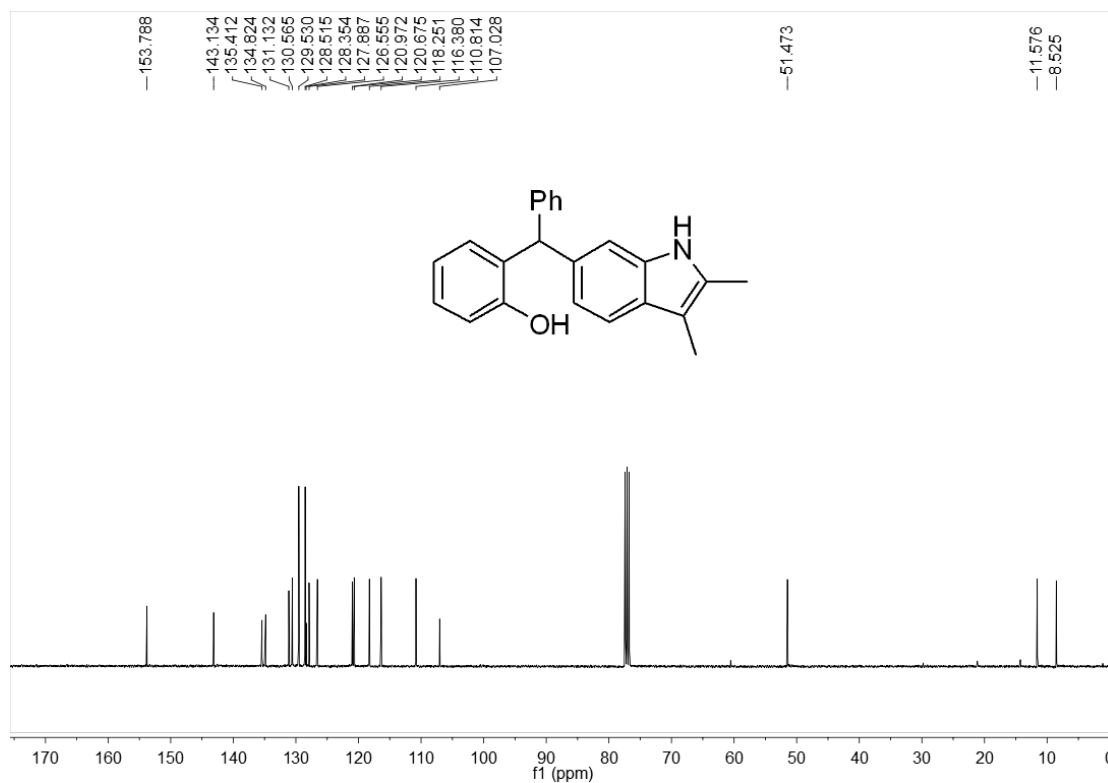

### $^1\text{H}$ NMR of compound **3ba**

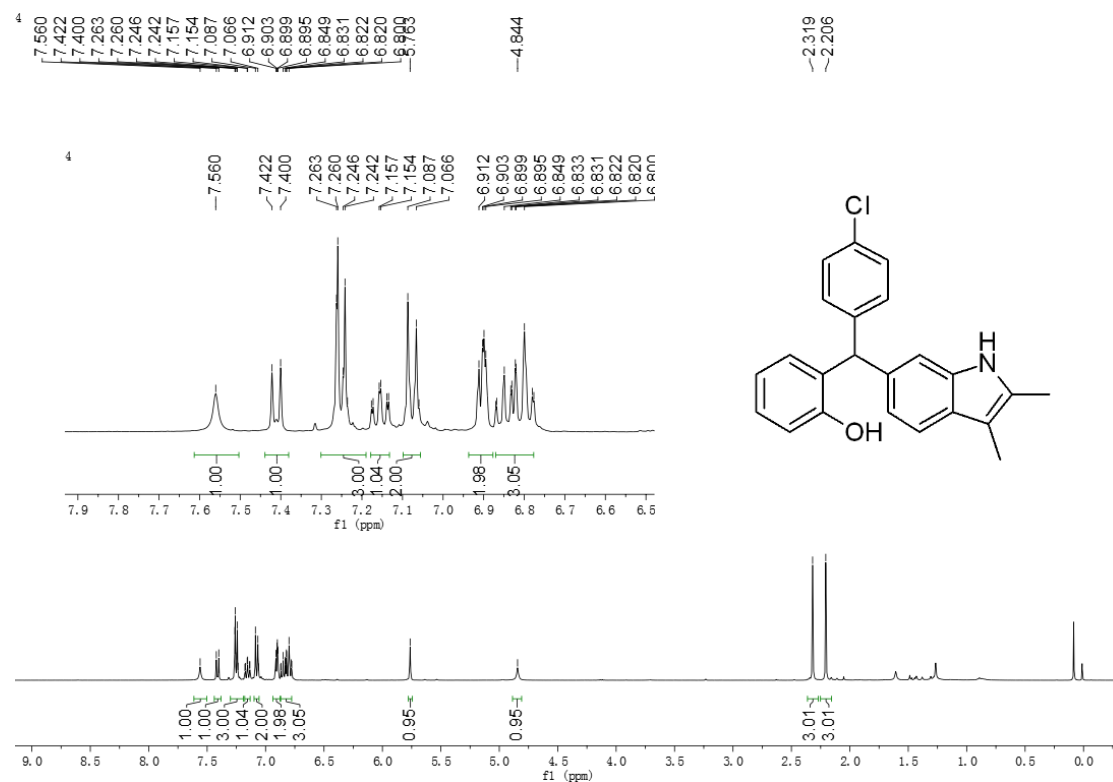

### $^{13}\text{C}$ NMR of compound **3ba**

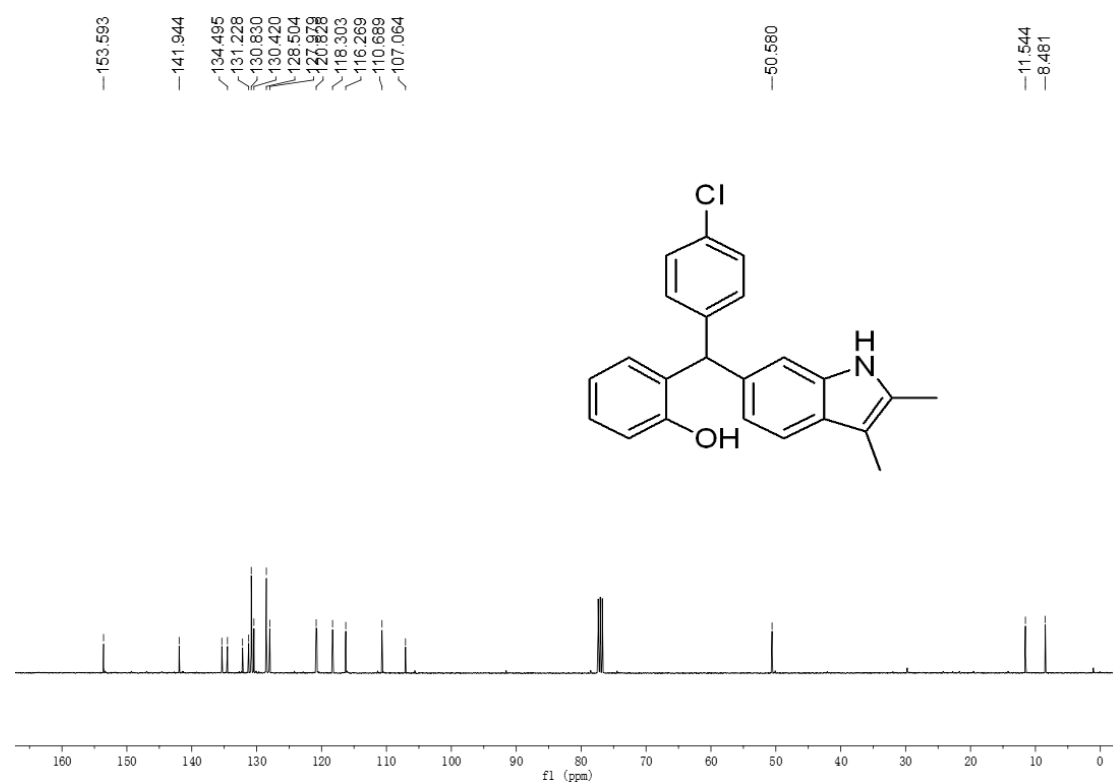

### <sup>1</sup>H NMR of compound 3ca

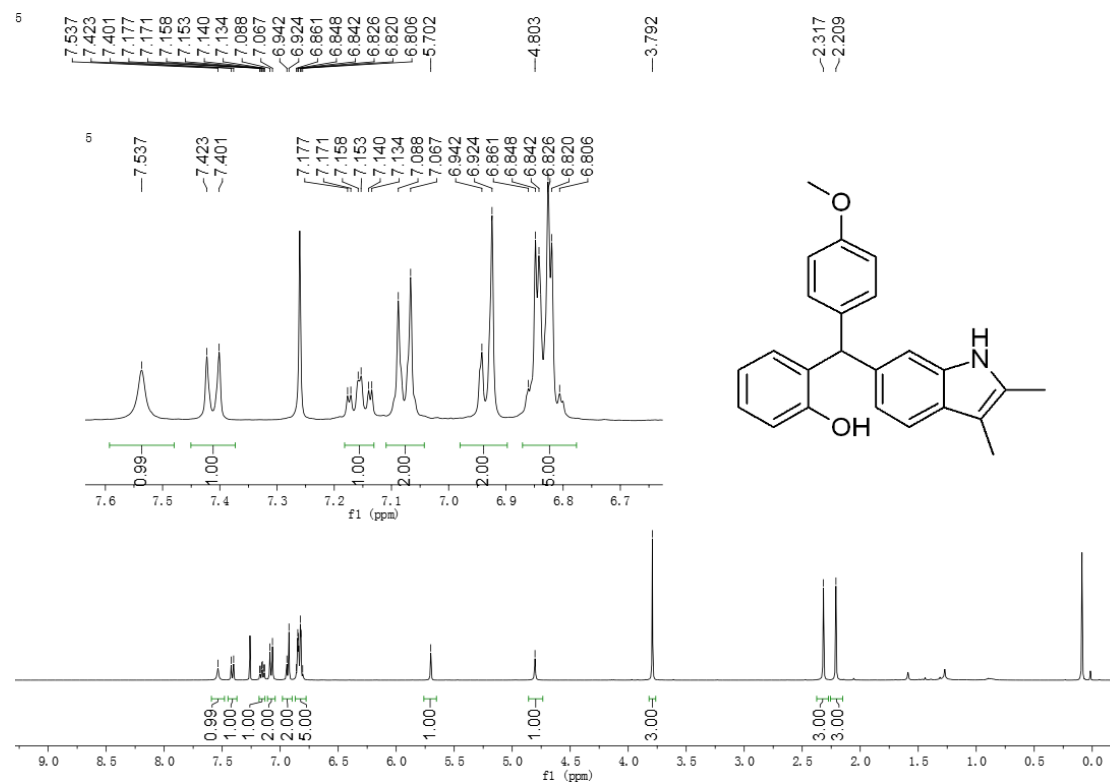

### <sup>13</sup>C NMR of compound 3ca

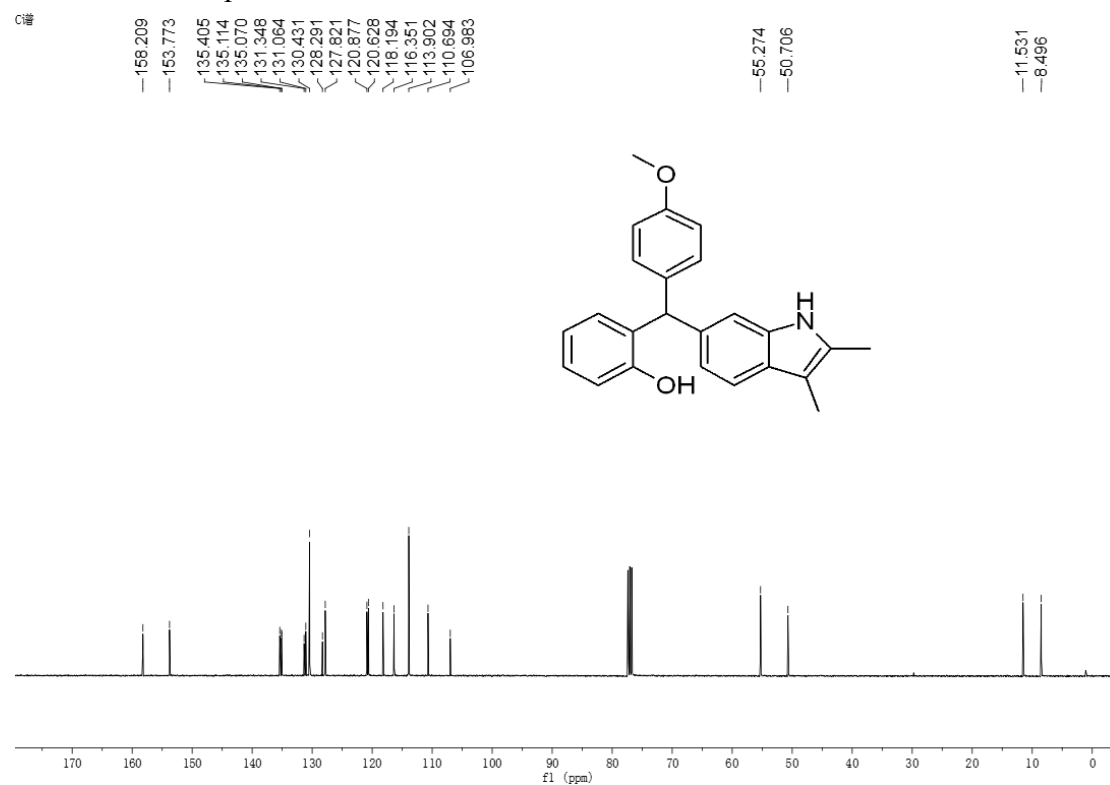

### <sup>1</sup>H NMR of compound 3da

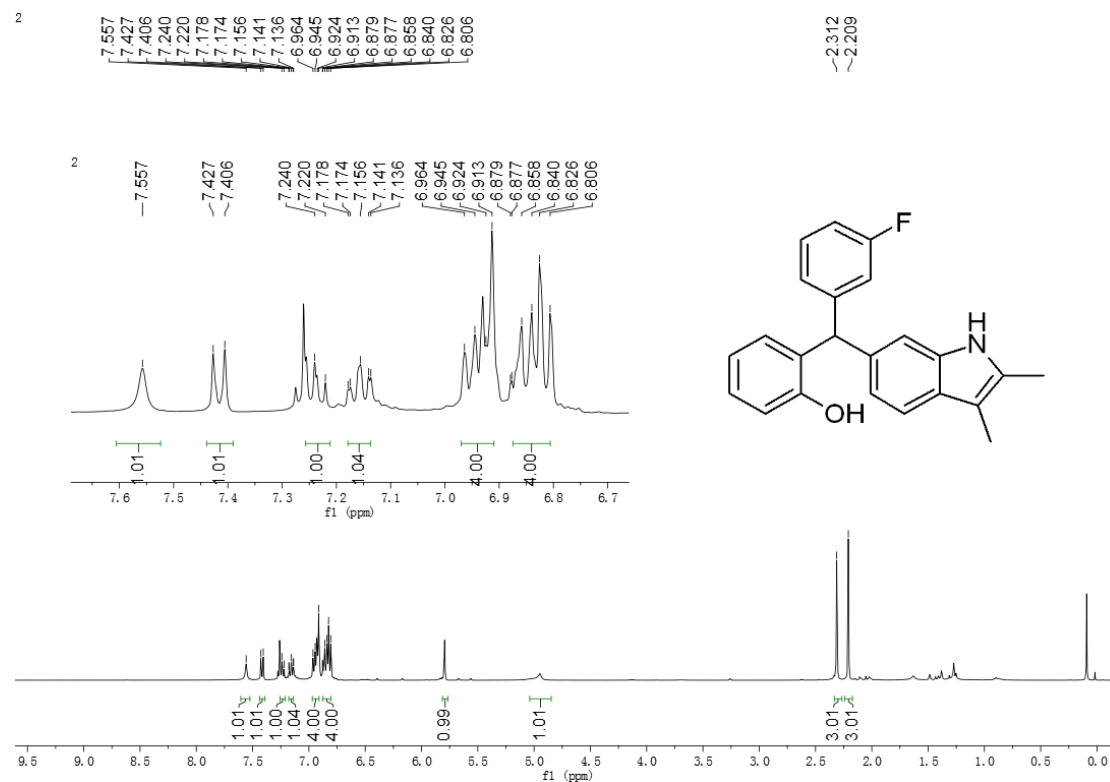

### <sup>13</sup>C NMR of compound 3da

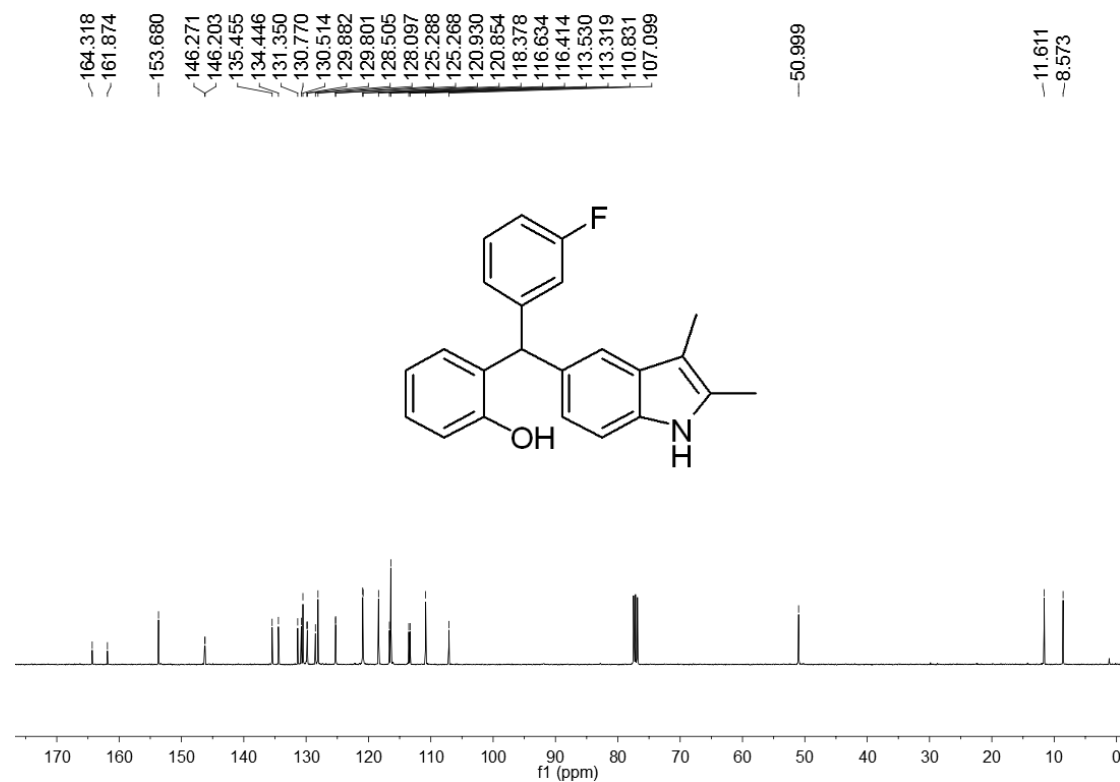

### <sup>1</sup>H NMR of compound 3ea

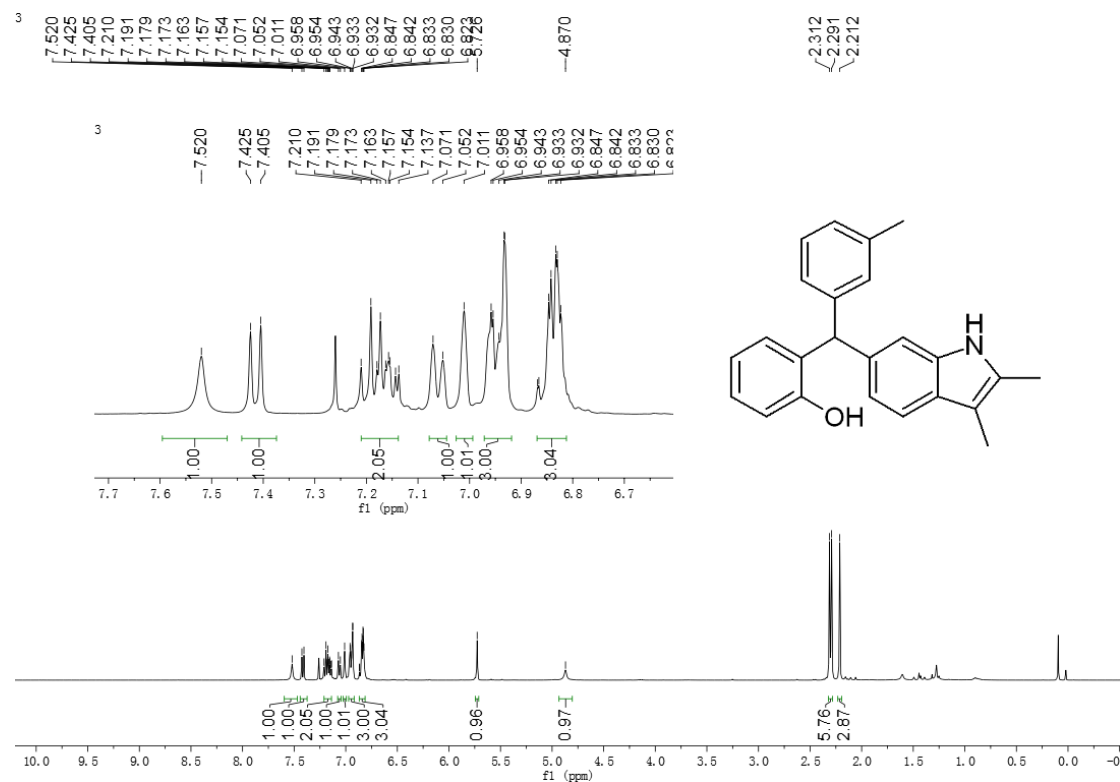

### <sup>13</sup>C NMR of compound 3ea

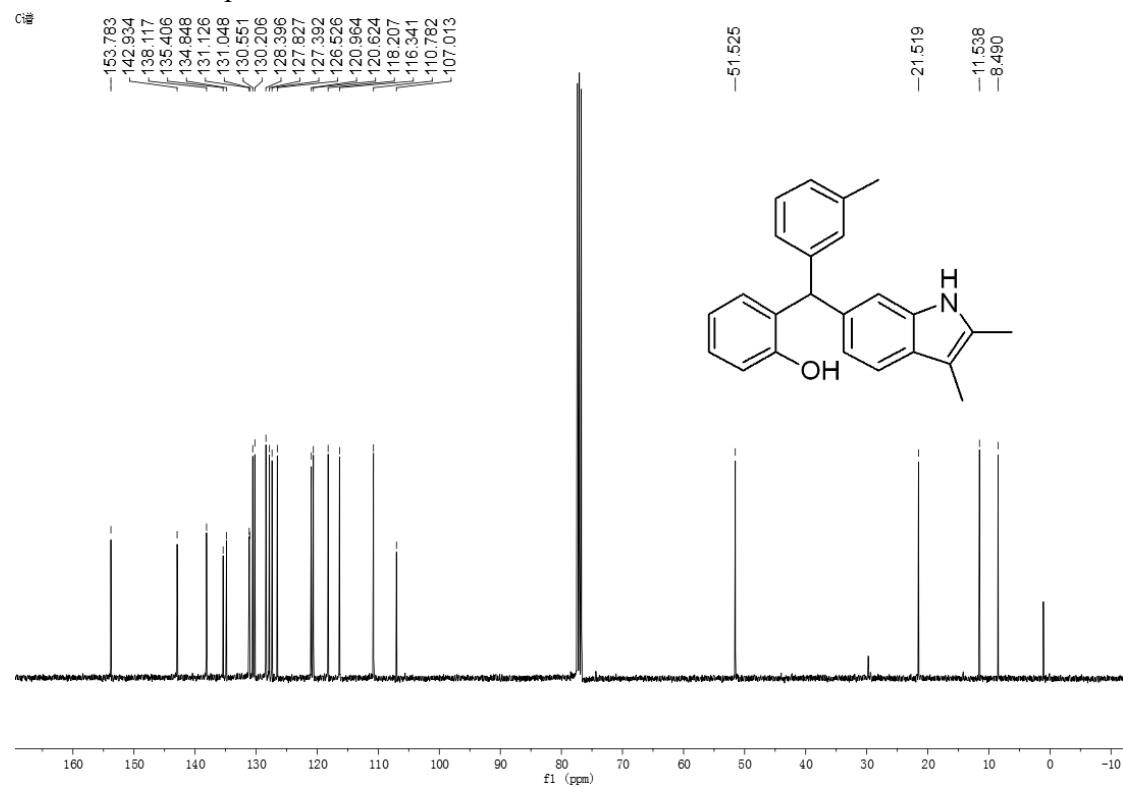

<sup>1</sup>H NMR of compound **3fa**

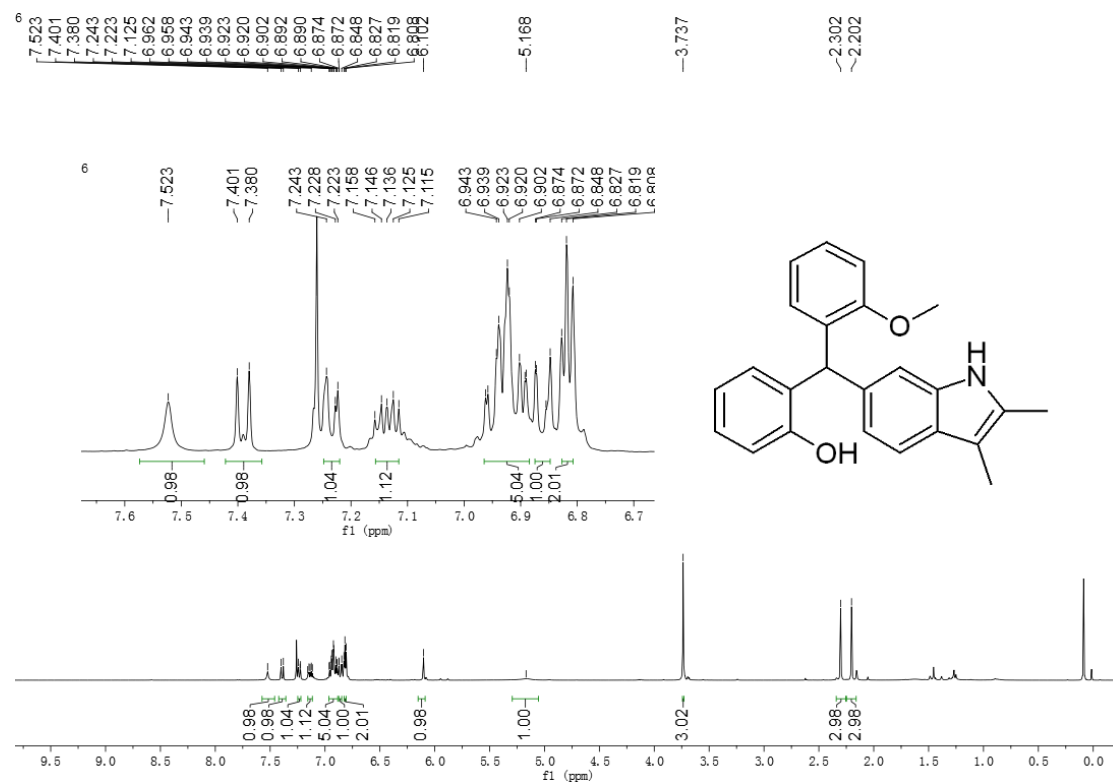

<sup>13</sup>C NMR of compound **3fa**

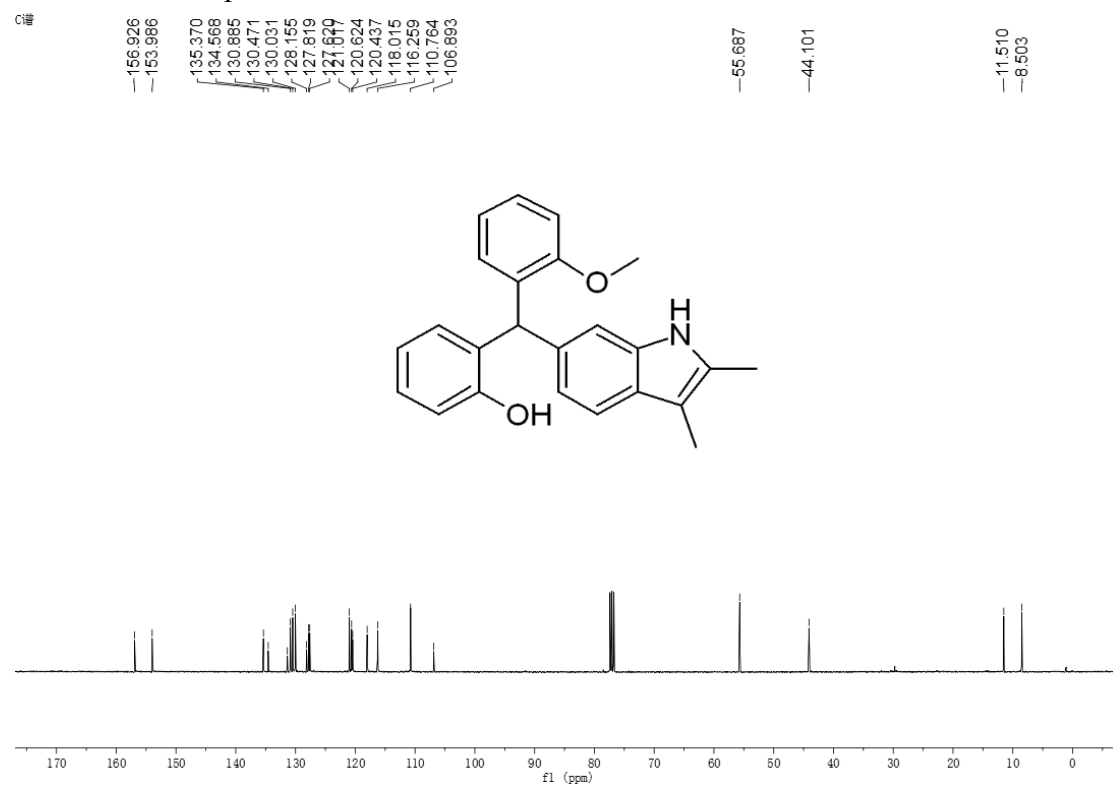

<sup>1</sup>H NMR of compound **3ga**

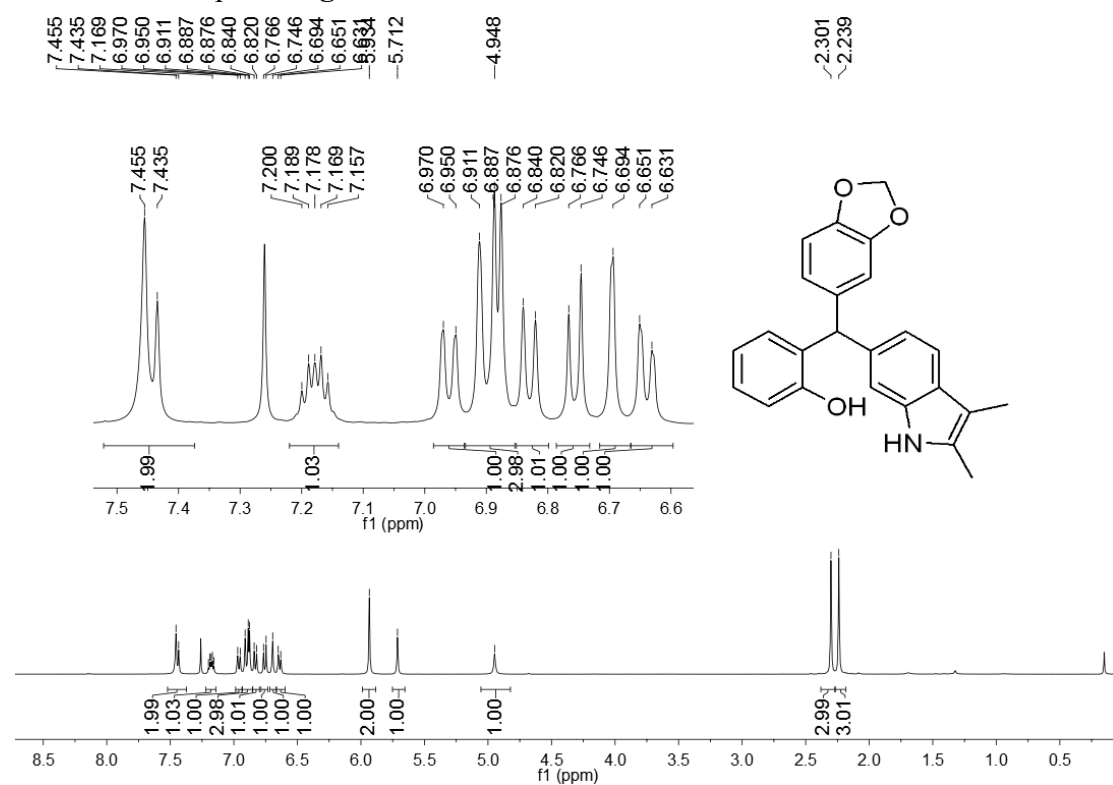

<sup>13</sup>C NMR of compound **3ga**

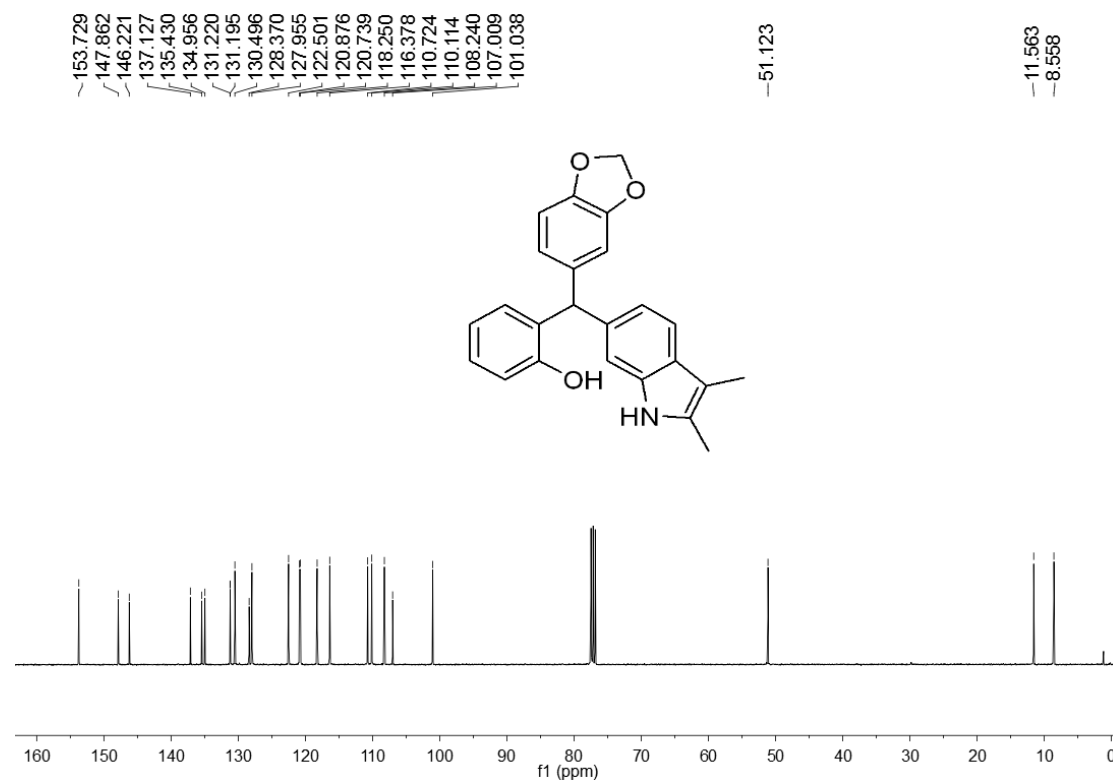



<sup>1</sup>H NMR of compound **3ha**

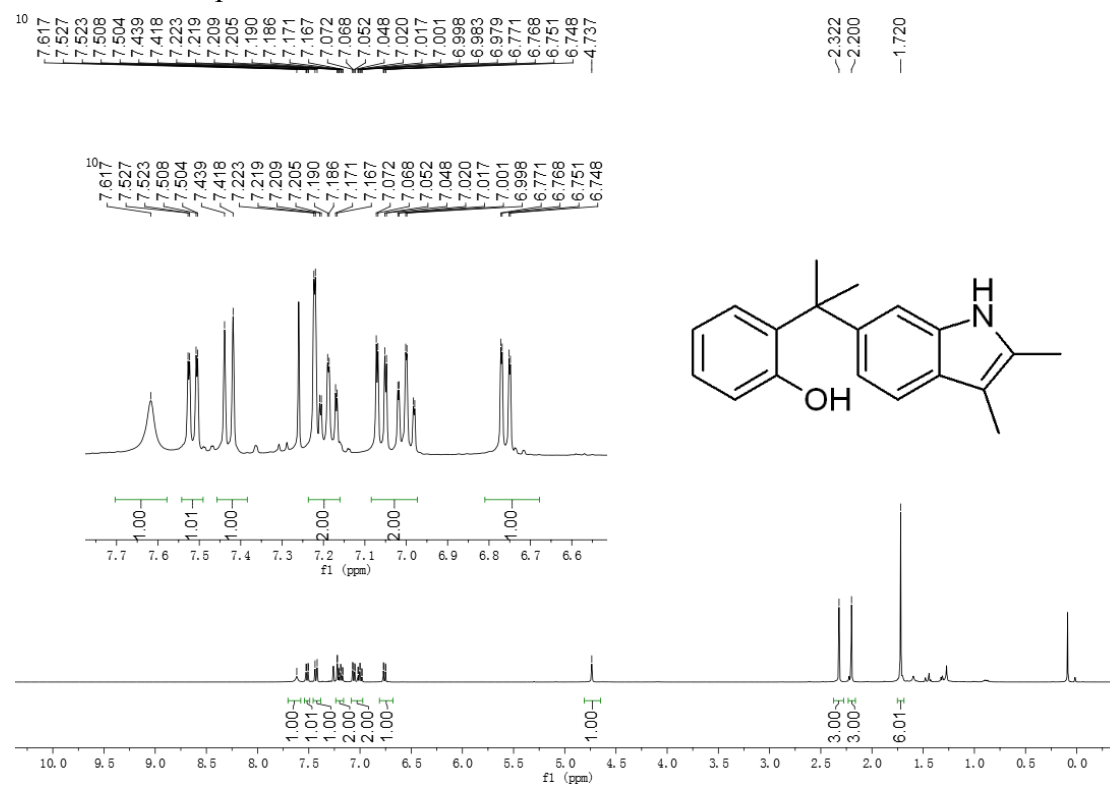

<sup>13</sup>C NMR of compound **3ha**

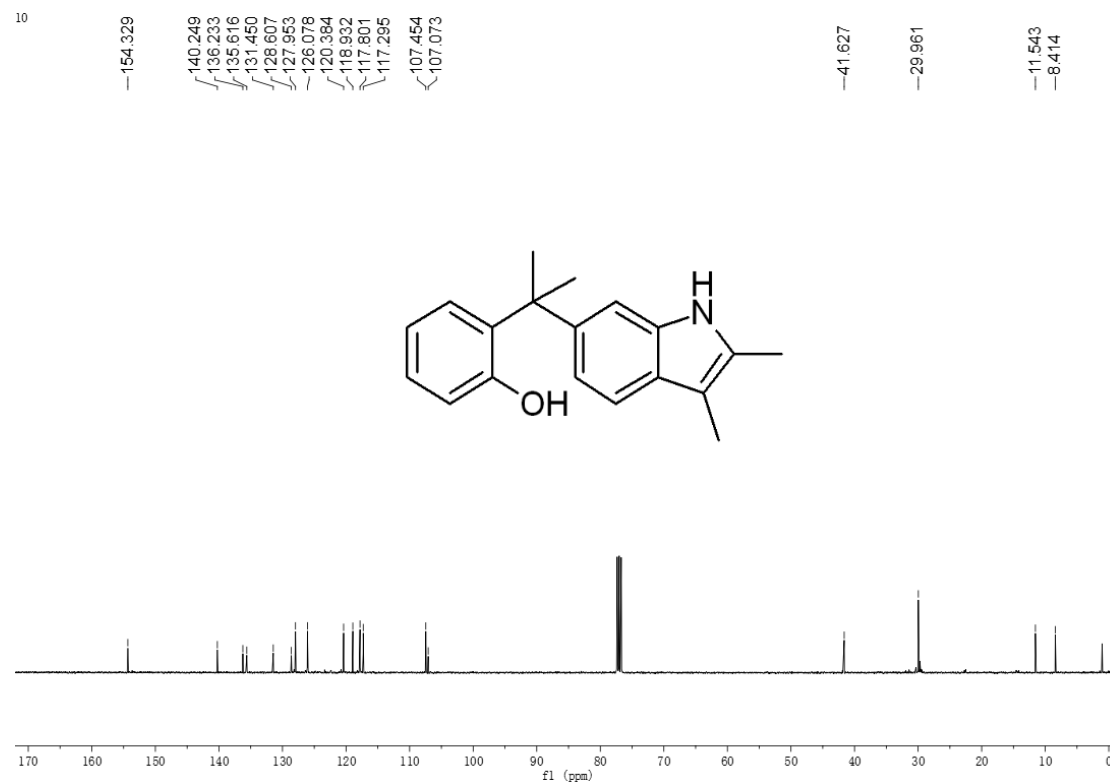

### <sup>1</sup>H NMR of compound **3ia**

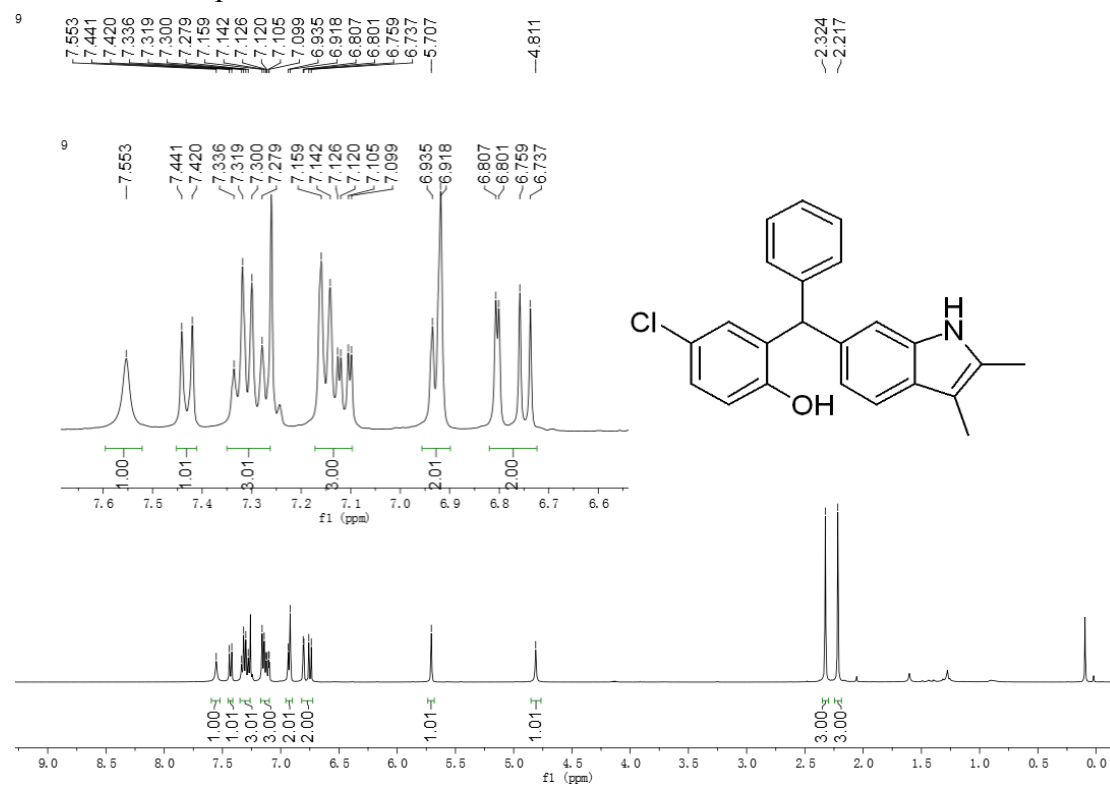

### <sup>13</sup>C NMR of compound **3ia**

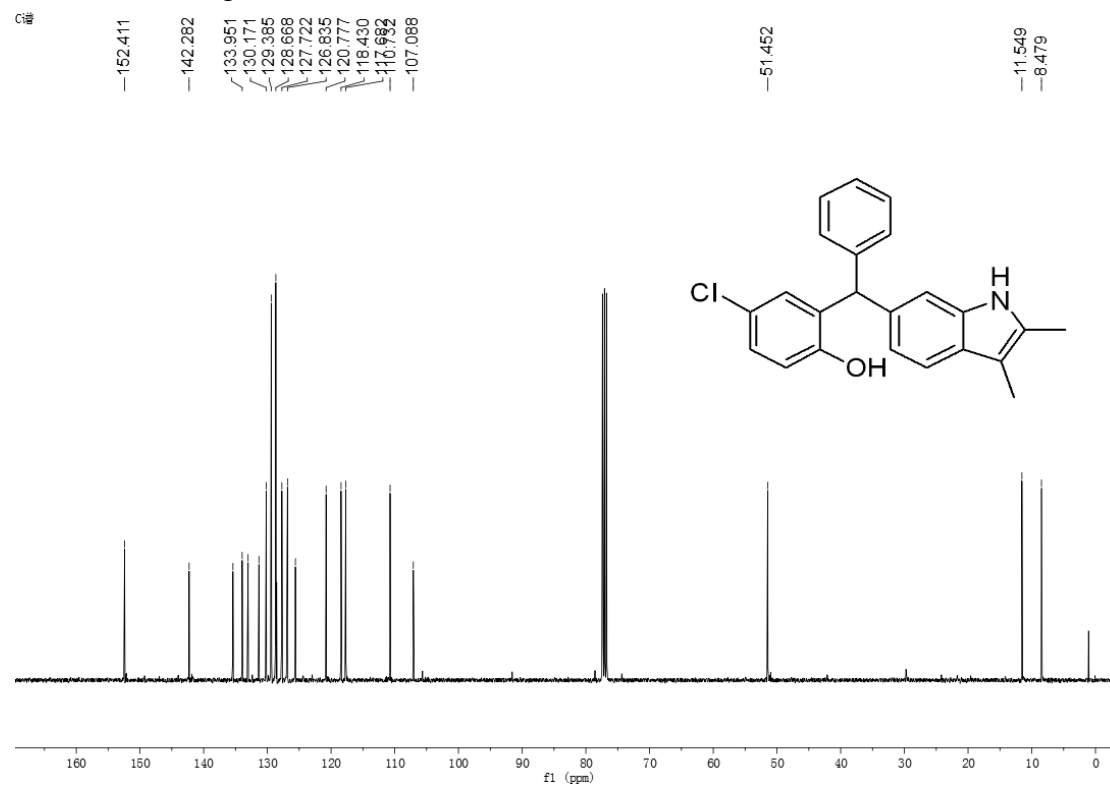

<sup>1</sup>H NMR of compound **3ja**

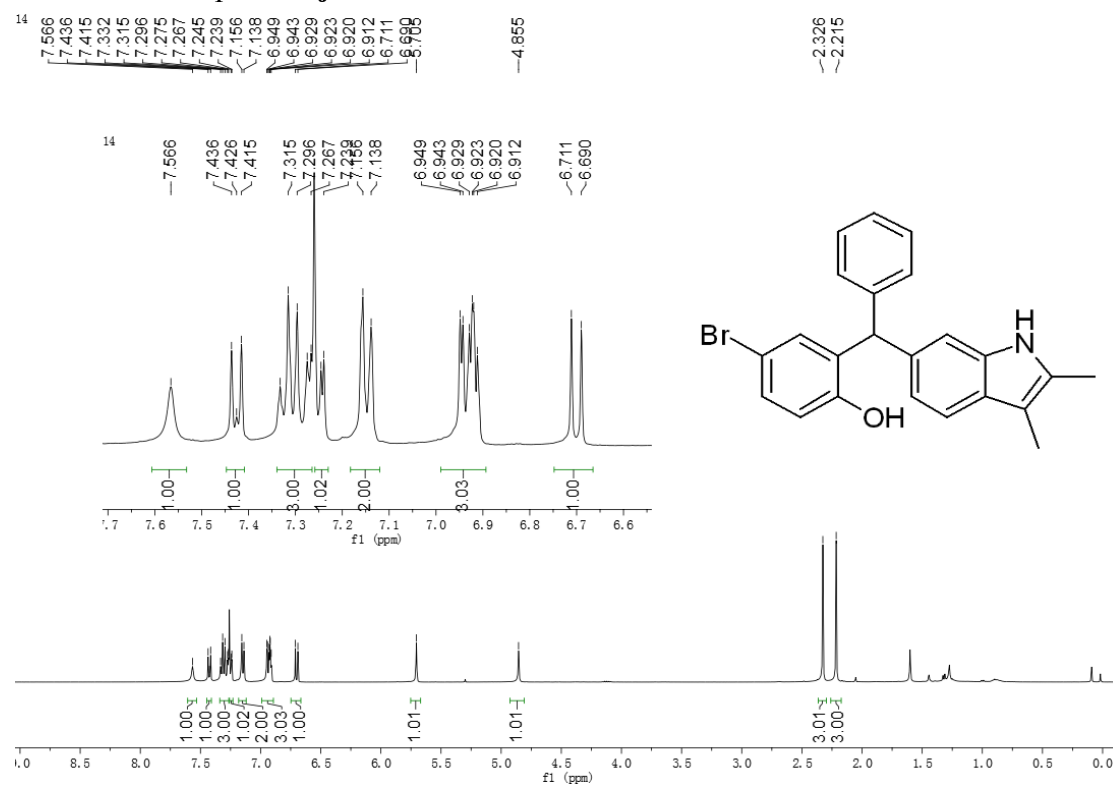

<sup>13</sup>C NMR of compound **3ja**

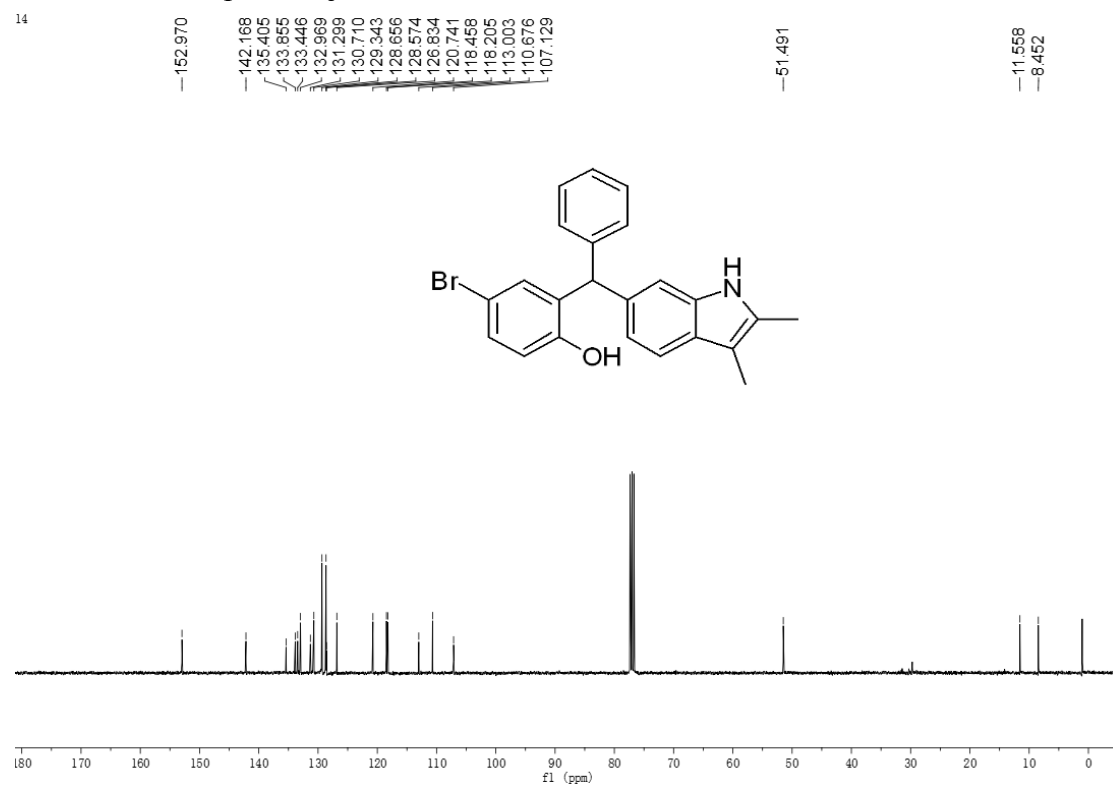

### <sup>1</sup>H NMR of compound **3ka**

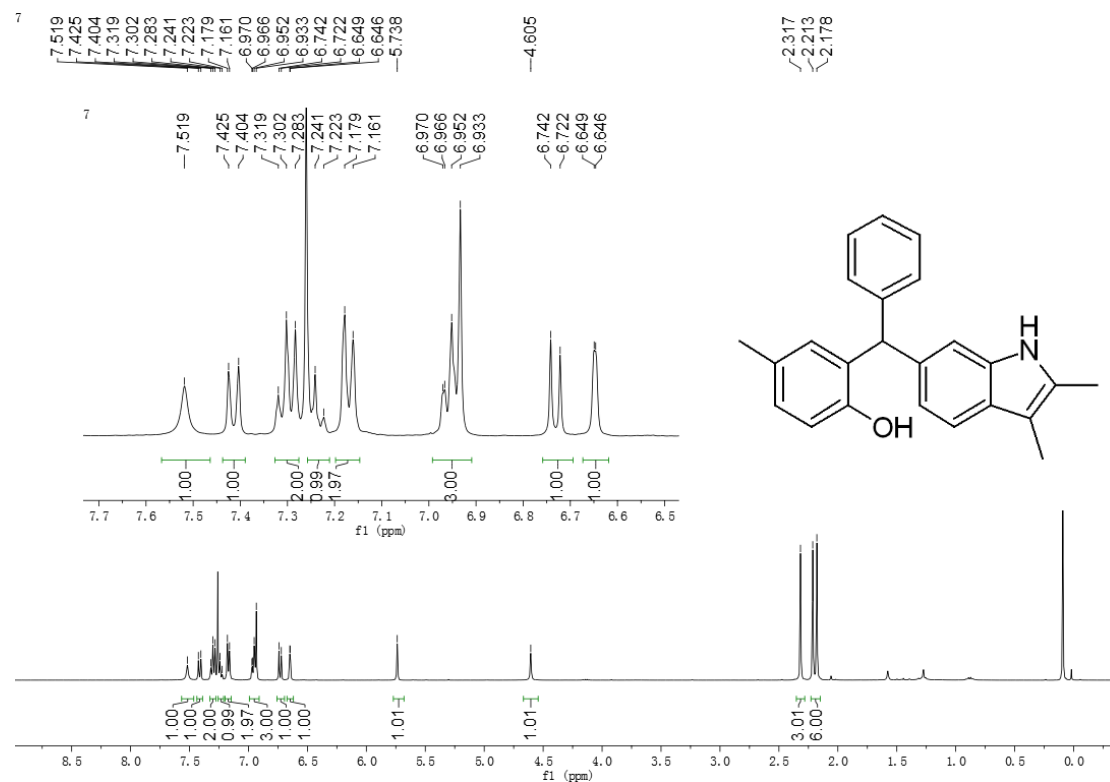

### <sup>13</sup>C NMR of compound **3ka**

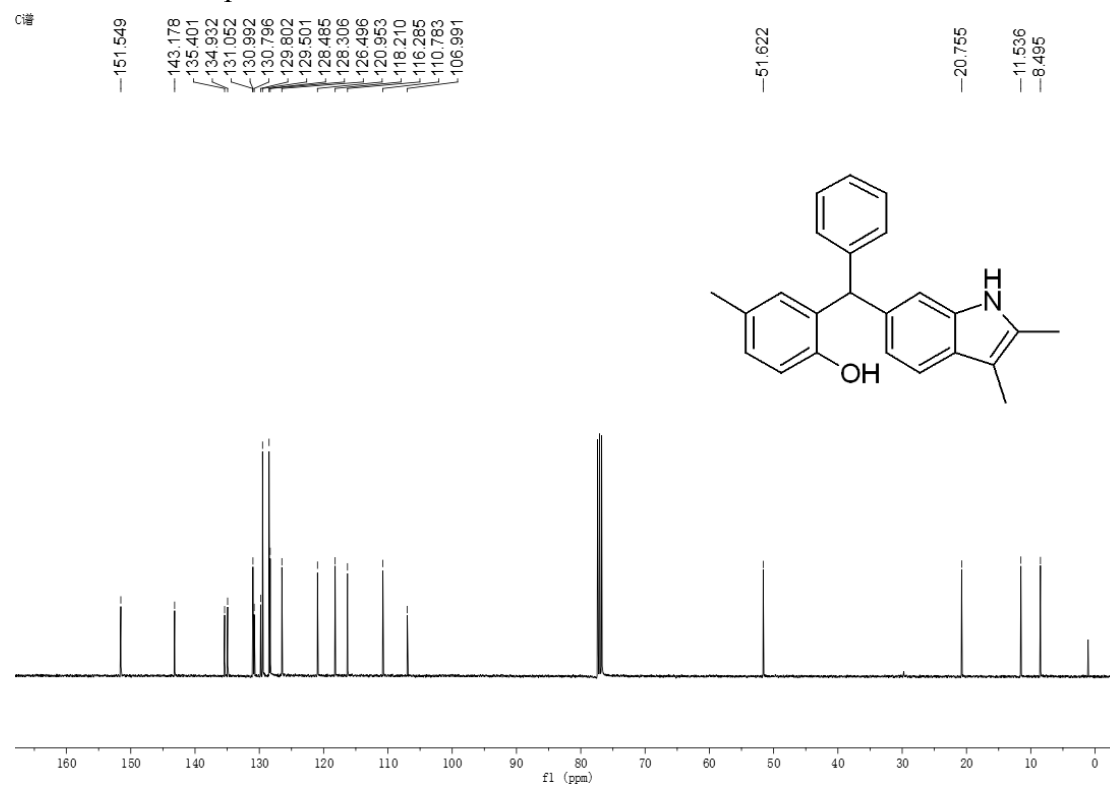

### <sup>1</sup>H NMR of compound **3la**

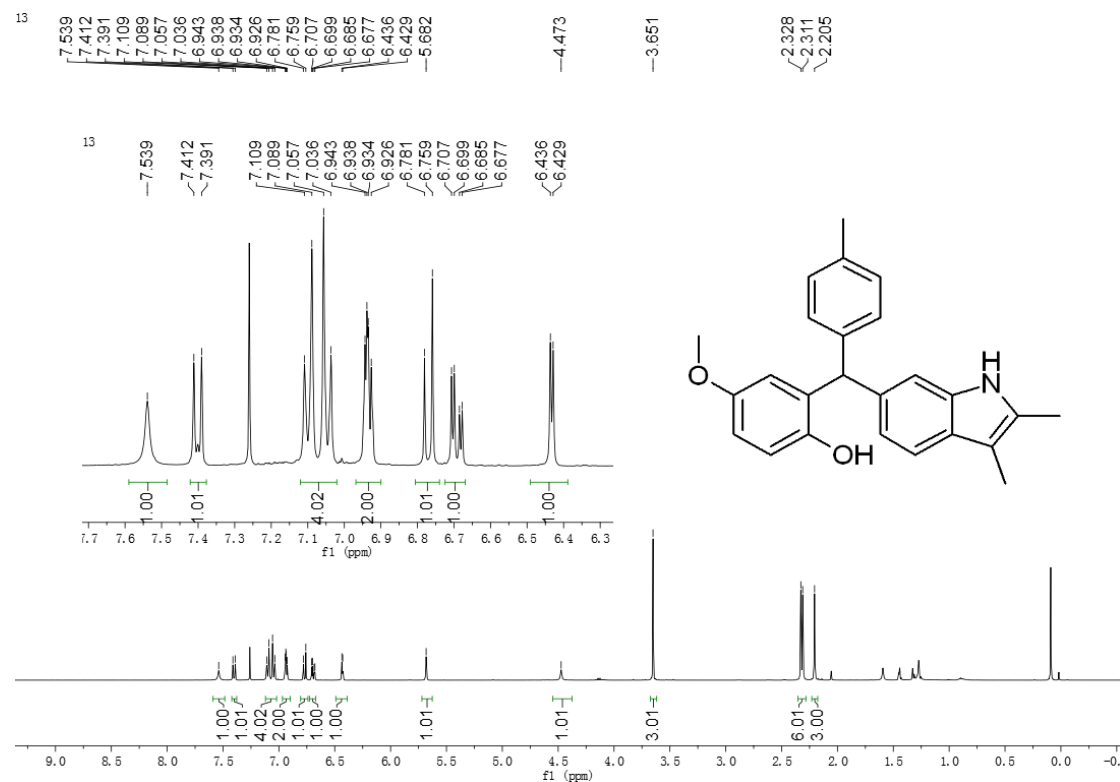

### <sup>13</sup>C NMR of compound **3la**

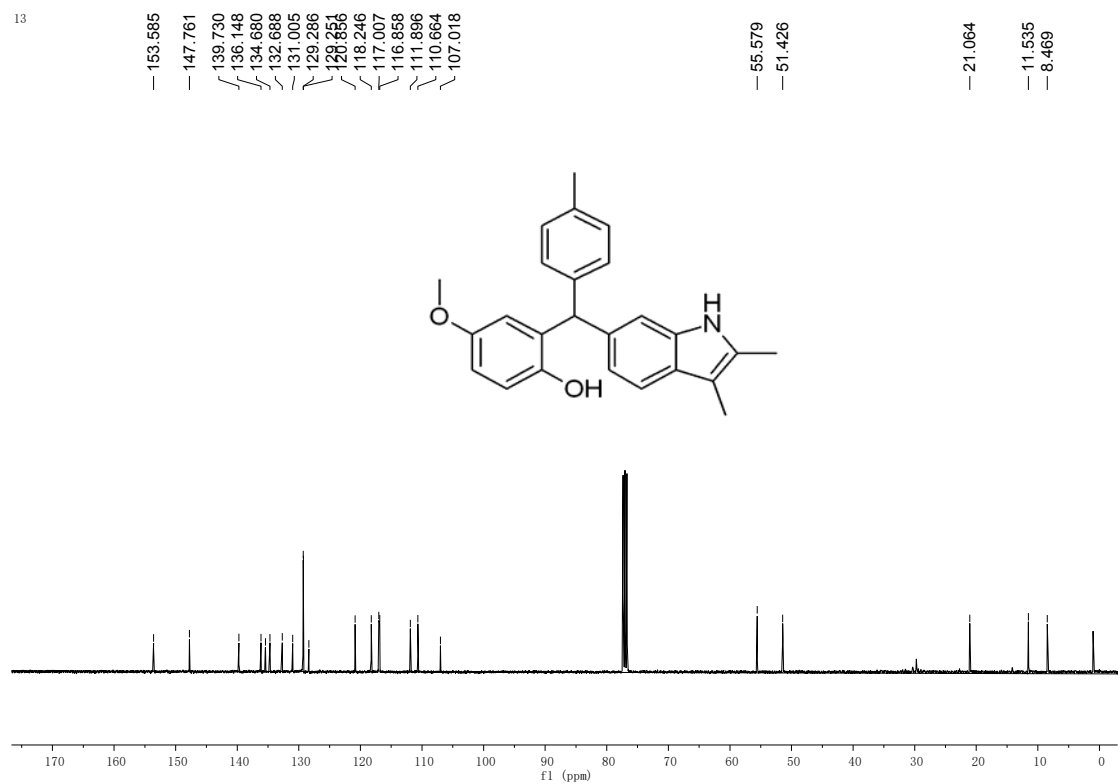

<sup>1</sup>H NMR of compound **3ma**

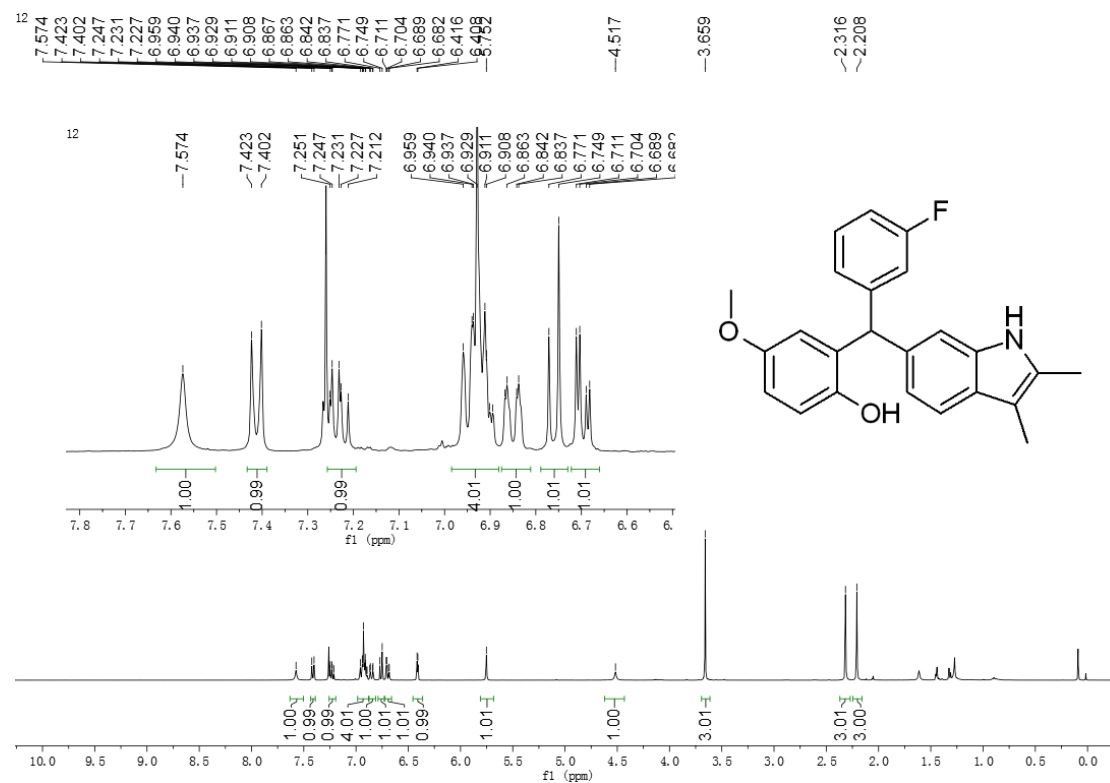

<sup>13</sup>C NMR of compound **3ma**

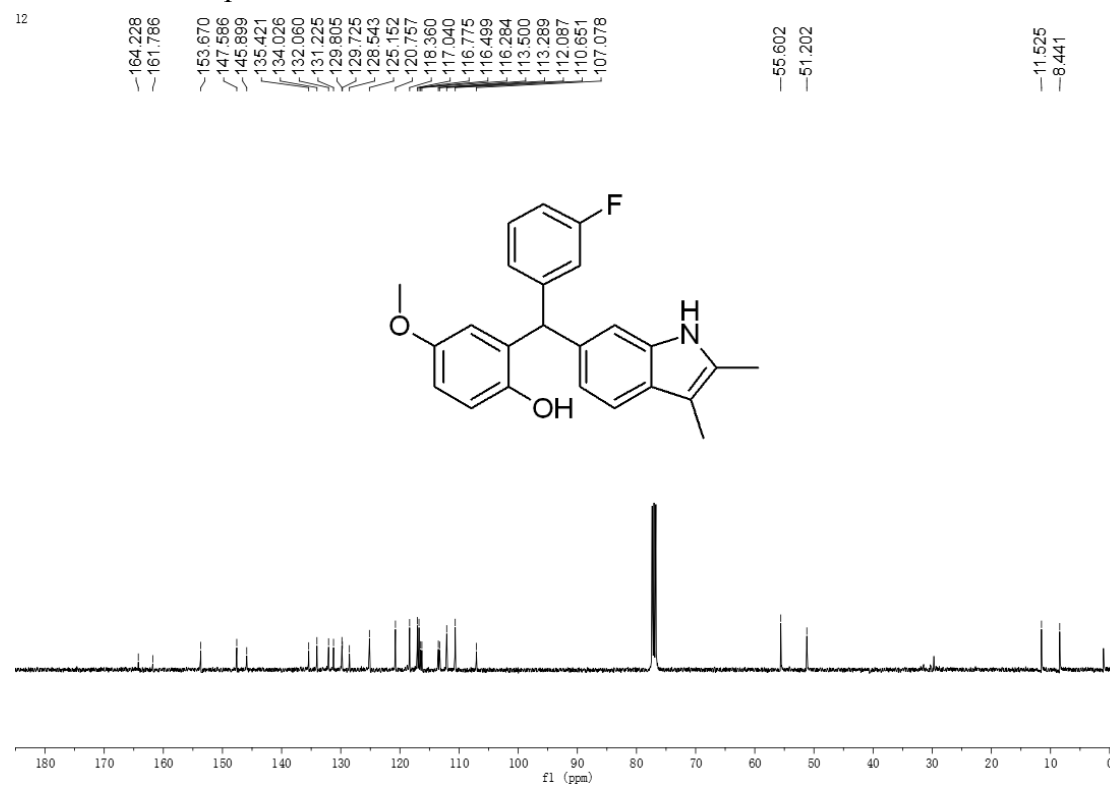

### <sup>1</sup>H NMR of compound **3na**

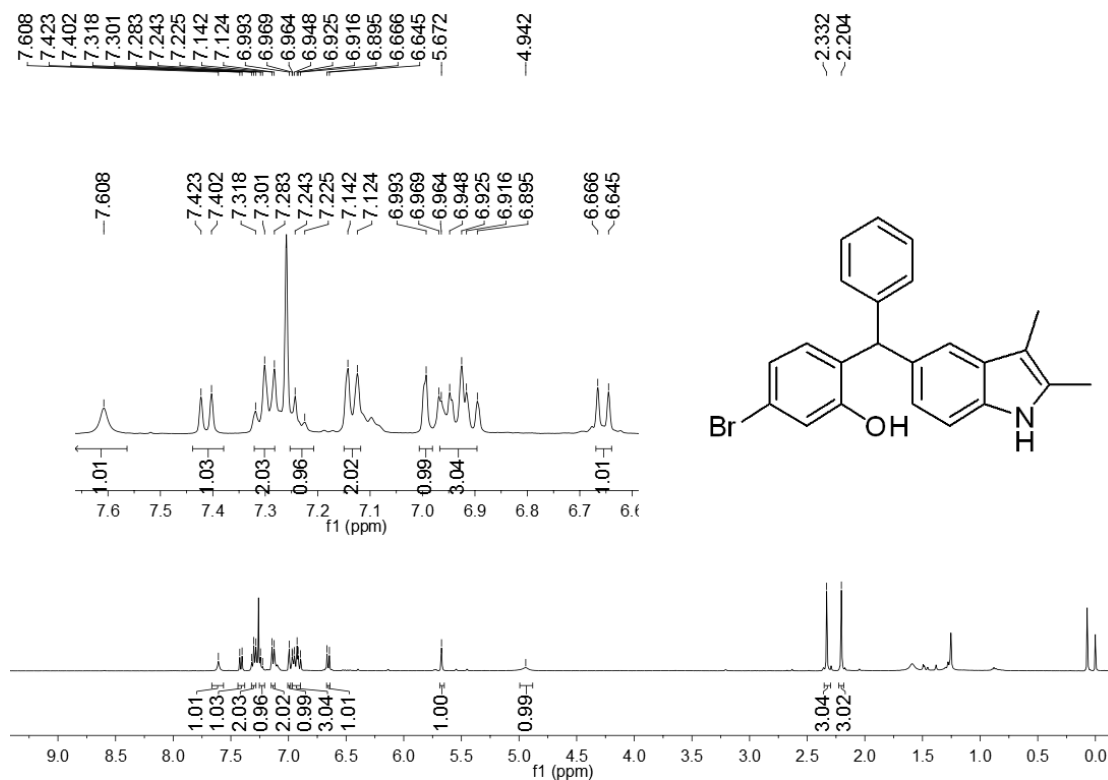

### <sup>13</sup>C NMR of compound **3na**

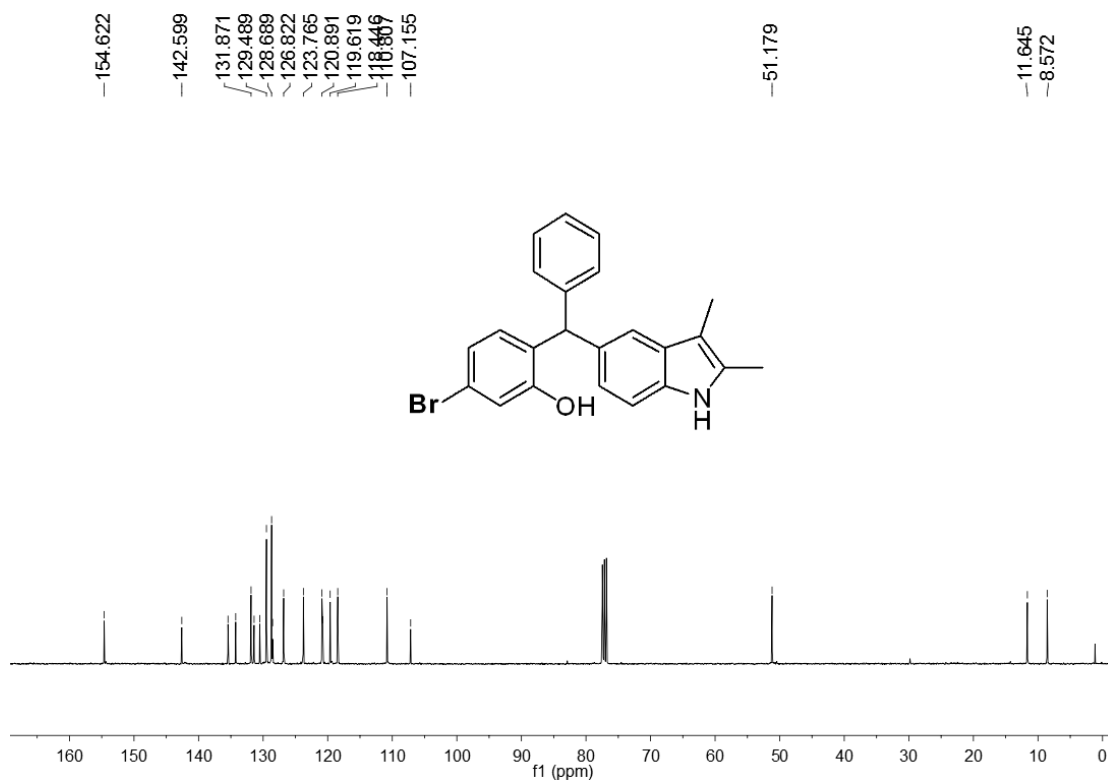

<sup>1</sup>H NMR of compound **30a**

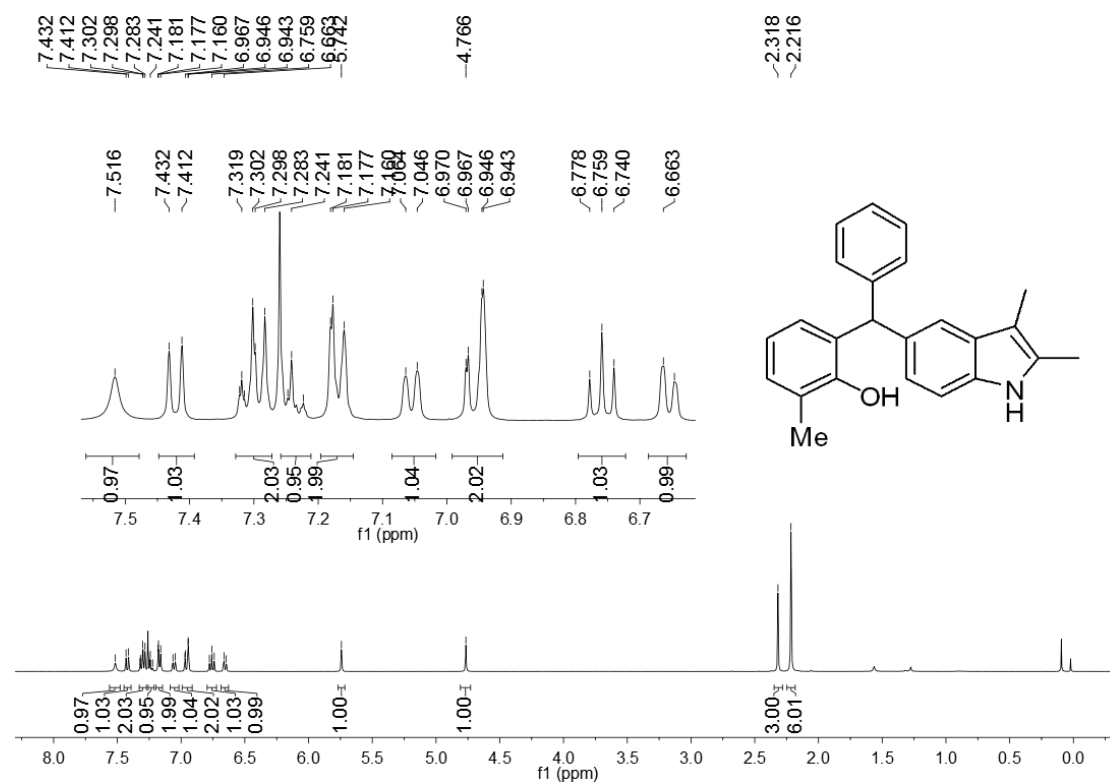

<sup>13</sup>C NMR of compound **30a**

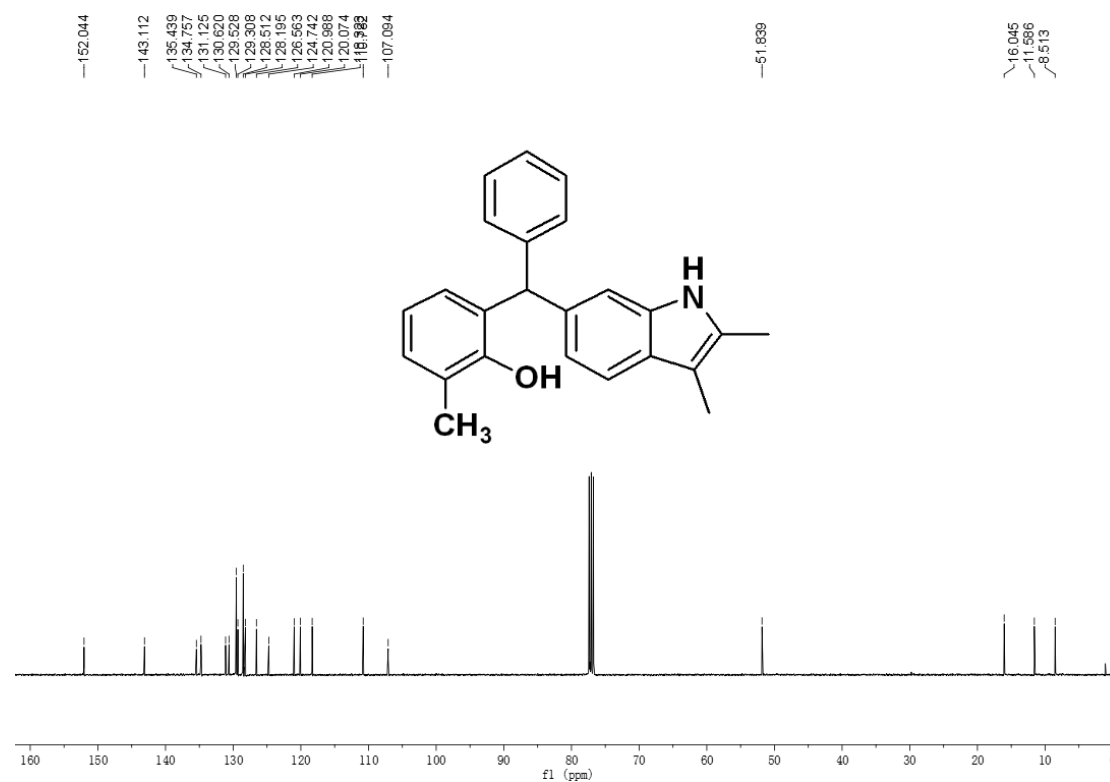



# <sup>1</sup>H NMR of compound **3ab**

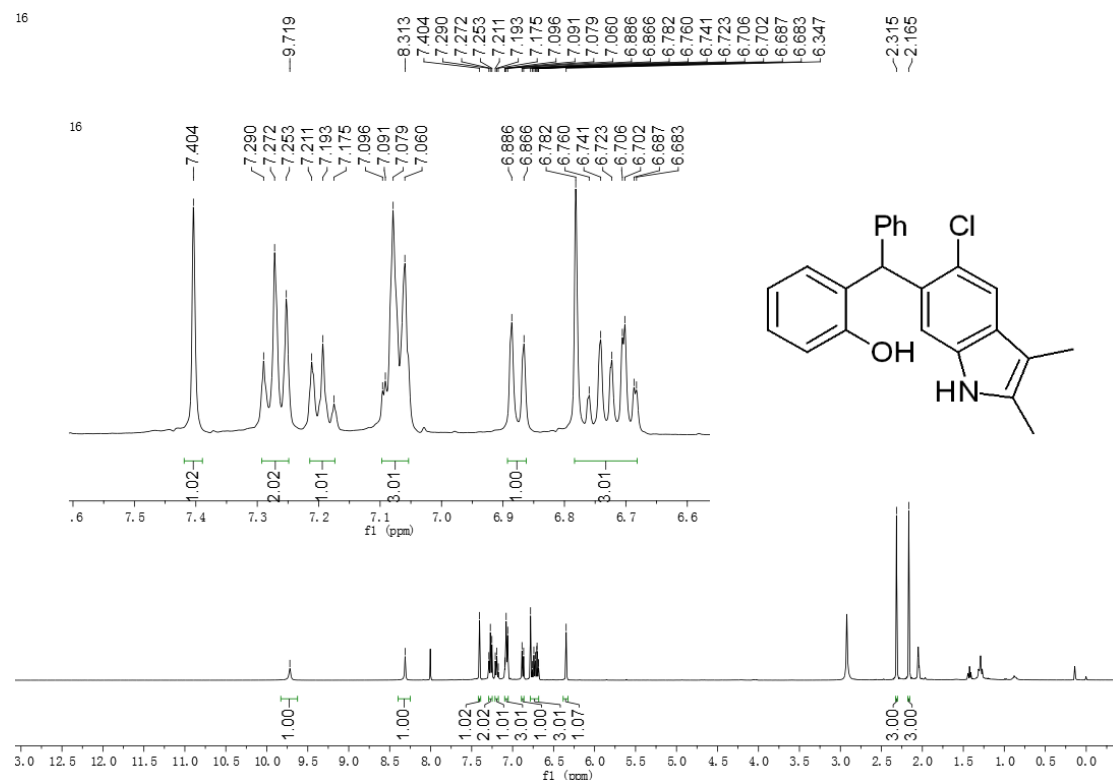

# <sup>13</sup>C NMR of compound **3ab**

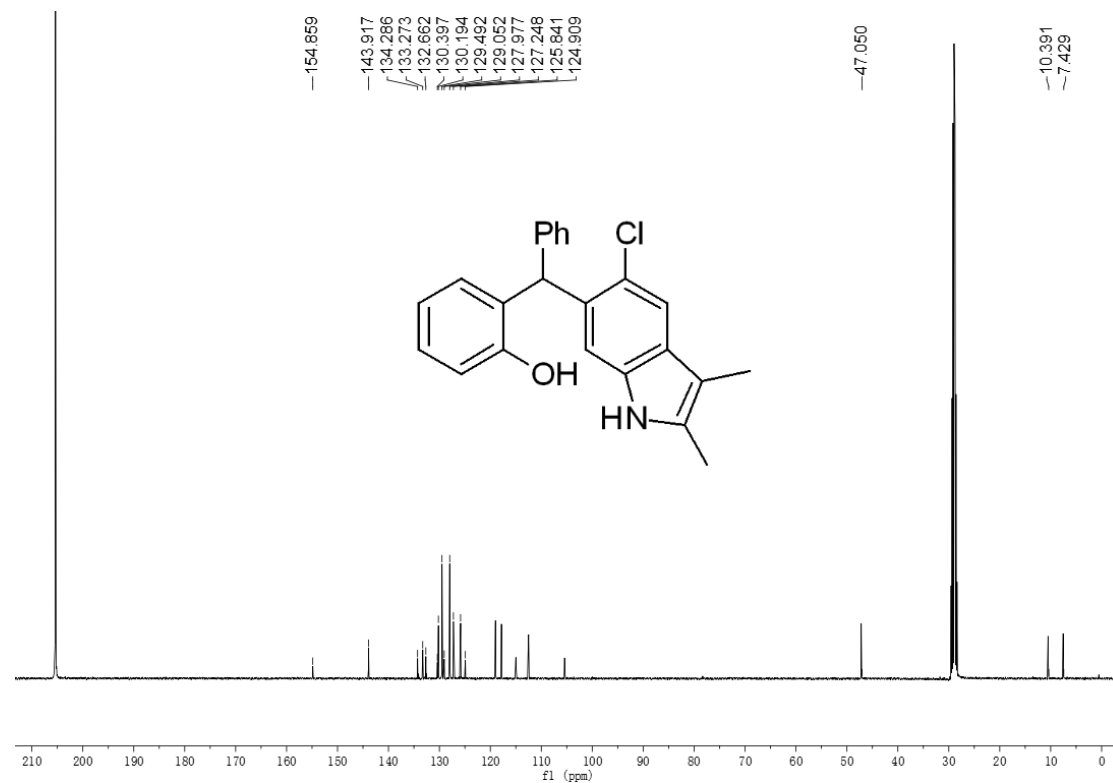



# <sup>1</sup>H NMR of compound 3ad

20

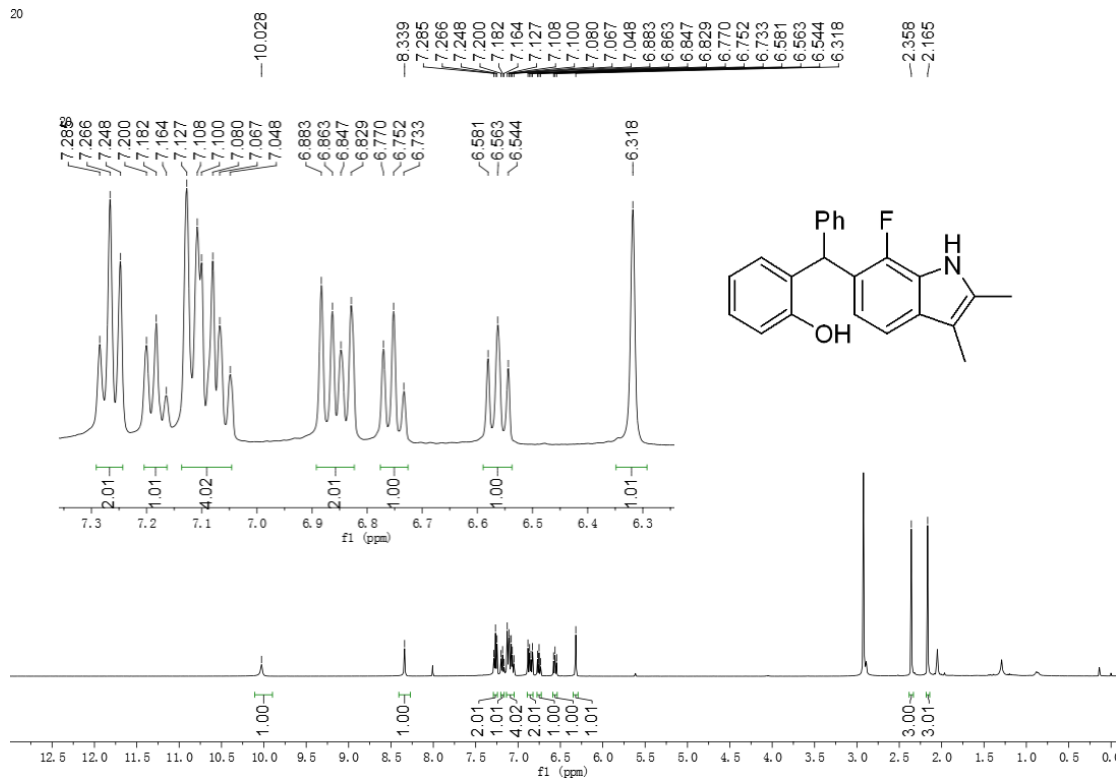

# <sup>13</sup>C NMR of compound 3ad

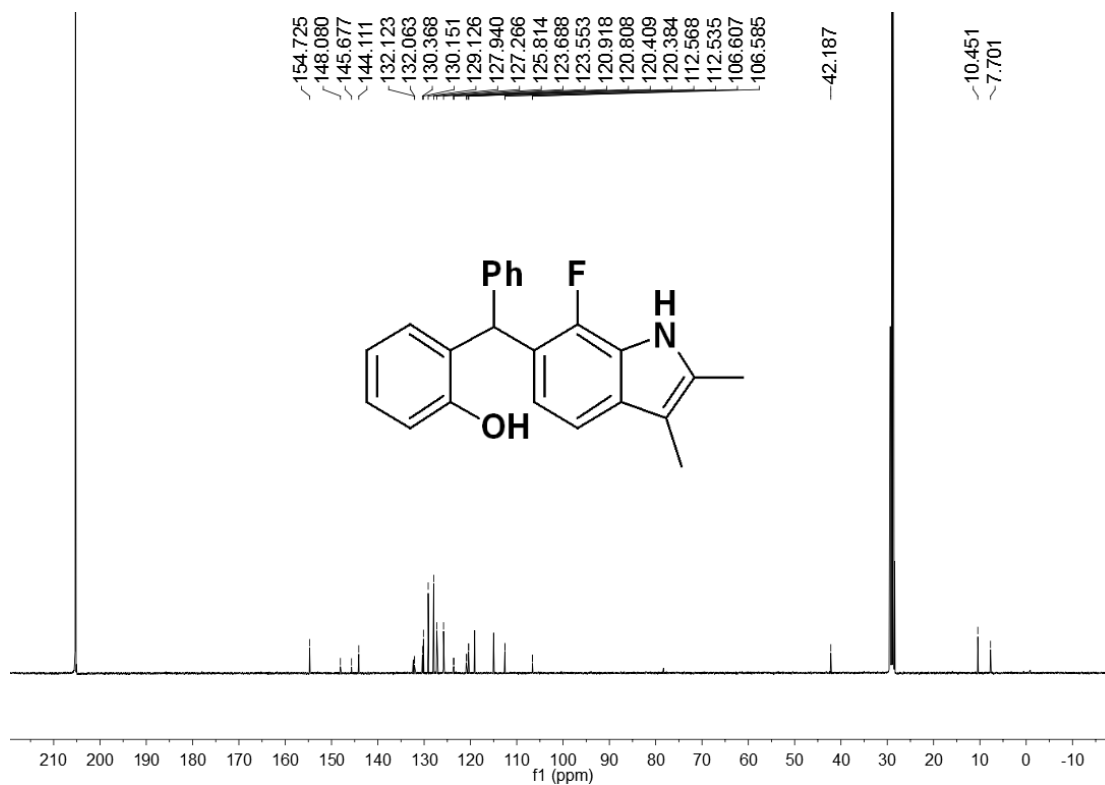

<sup>1</sup>H NMR of compound **3ae**

18

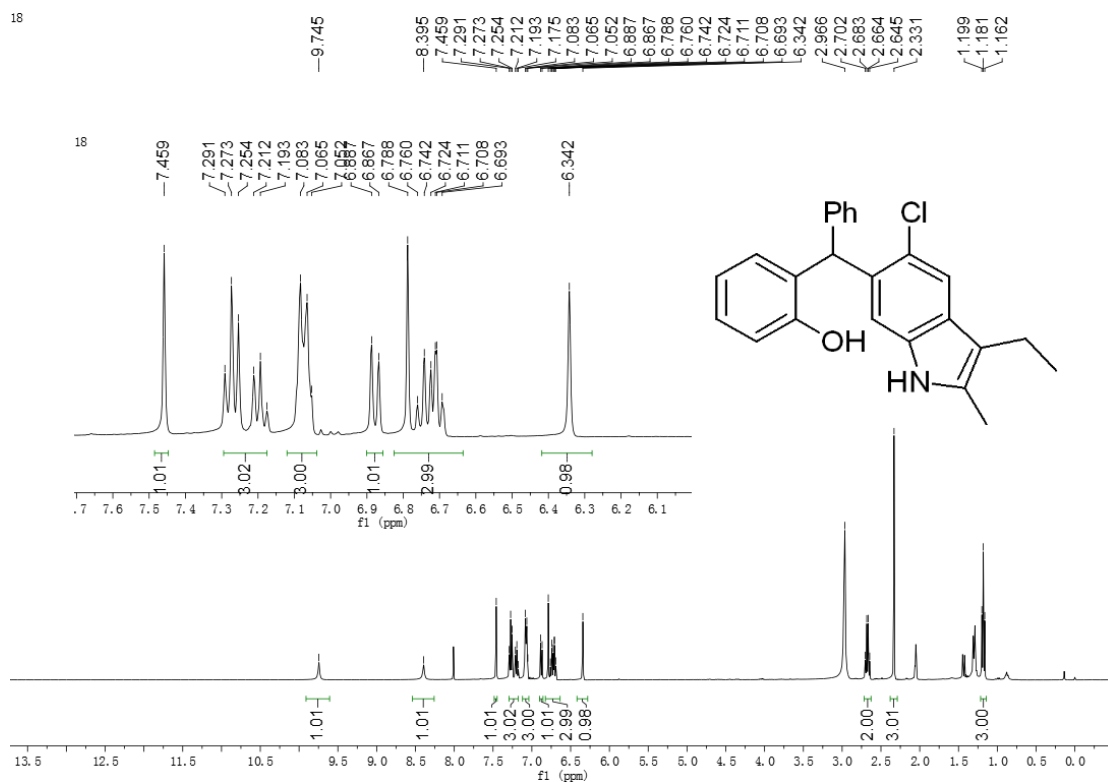

<sup>13</sup>C NMR of compound **3ae**

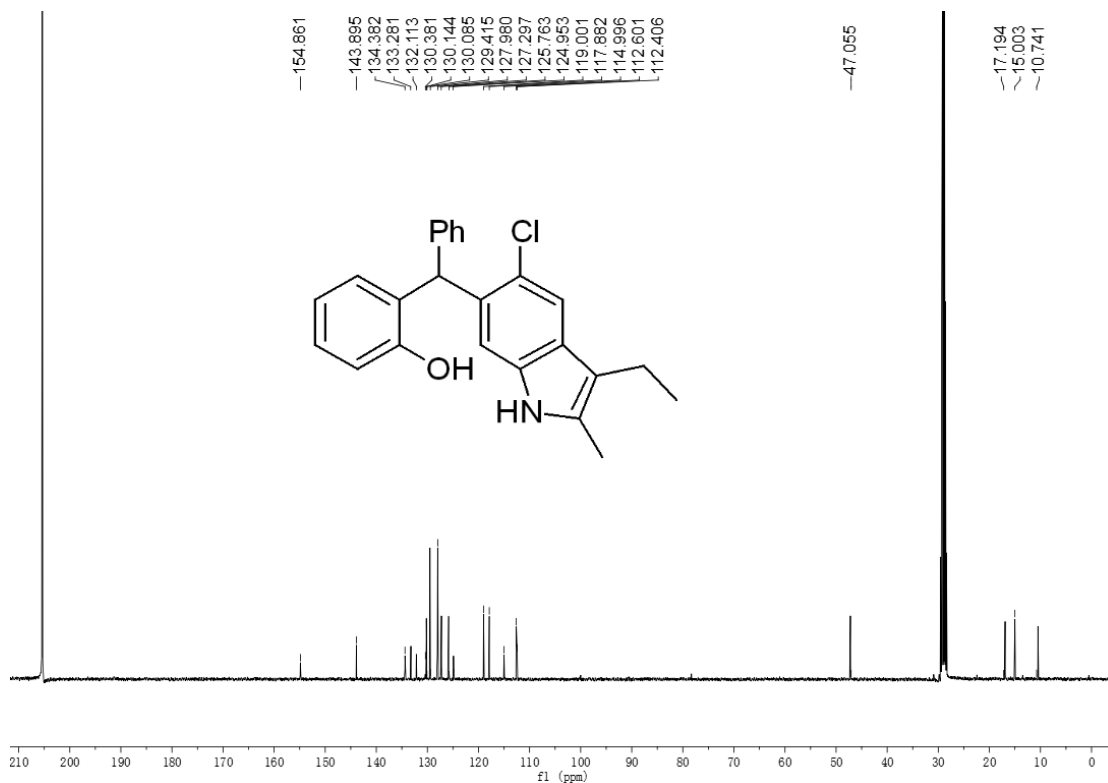

<sup>1</sup>H NMR of compound **3af**

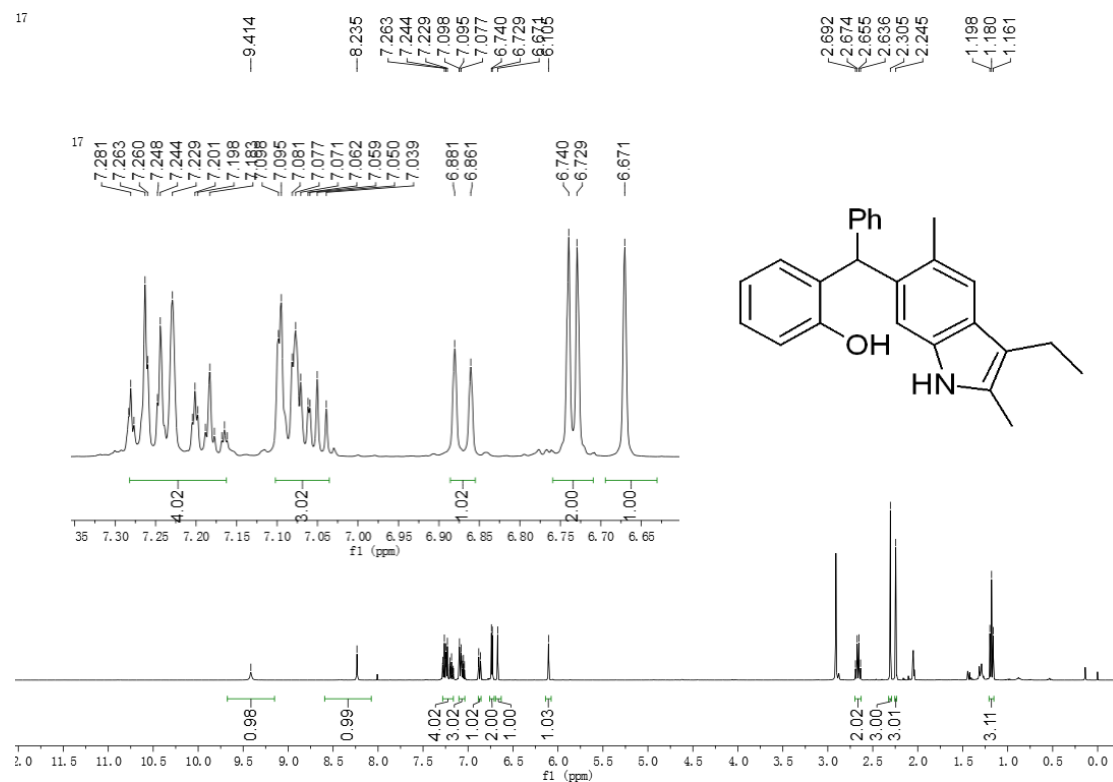

<sup>13</sup>C NMR of compound **3af**

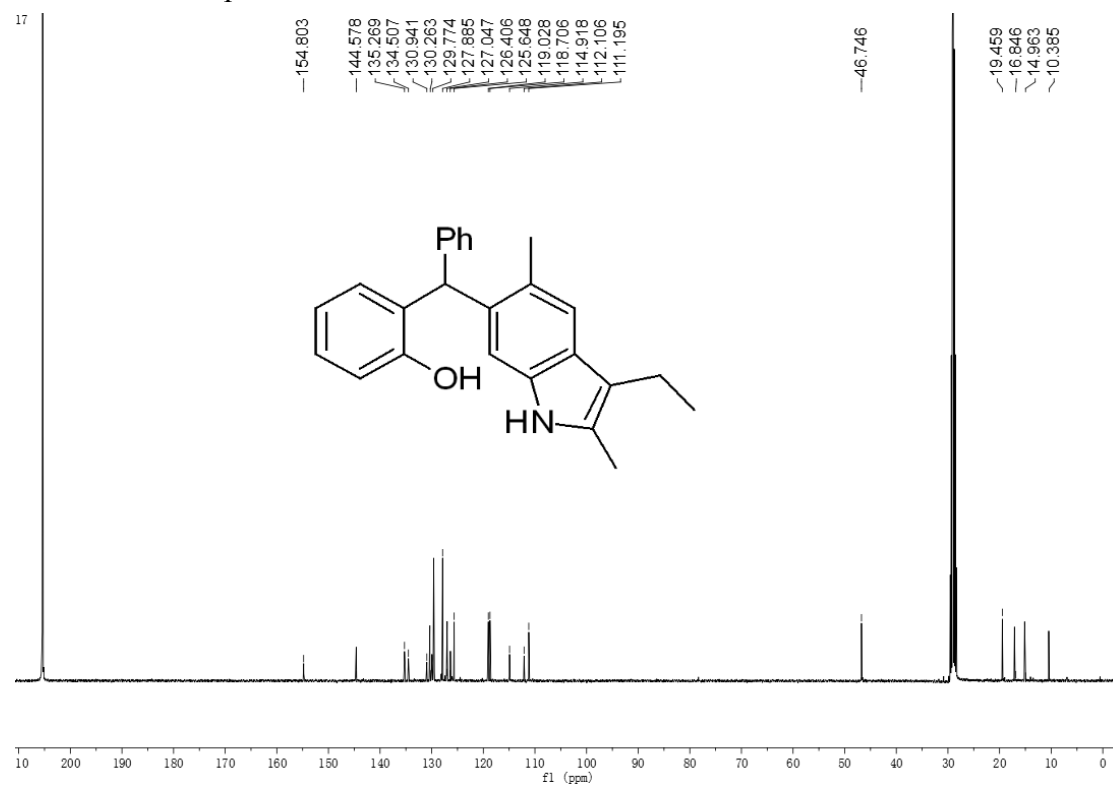

### <sup>1</sup>H NMR of compound **3ag**

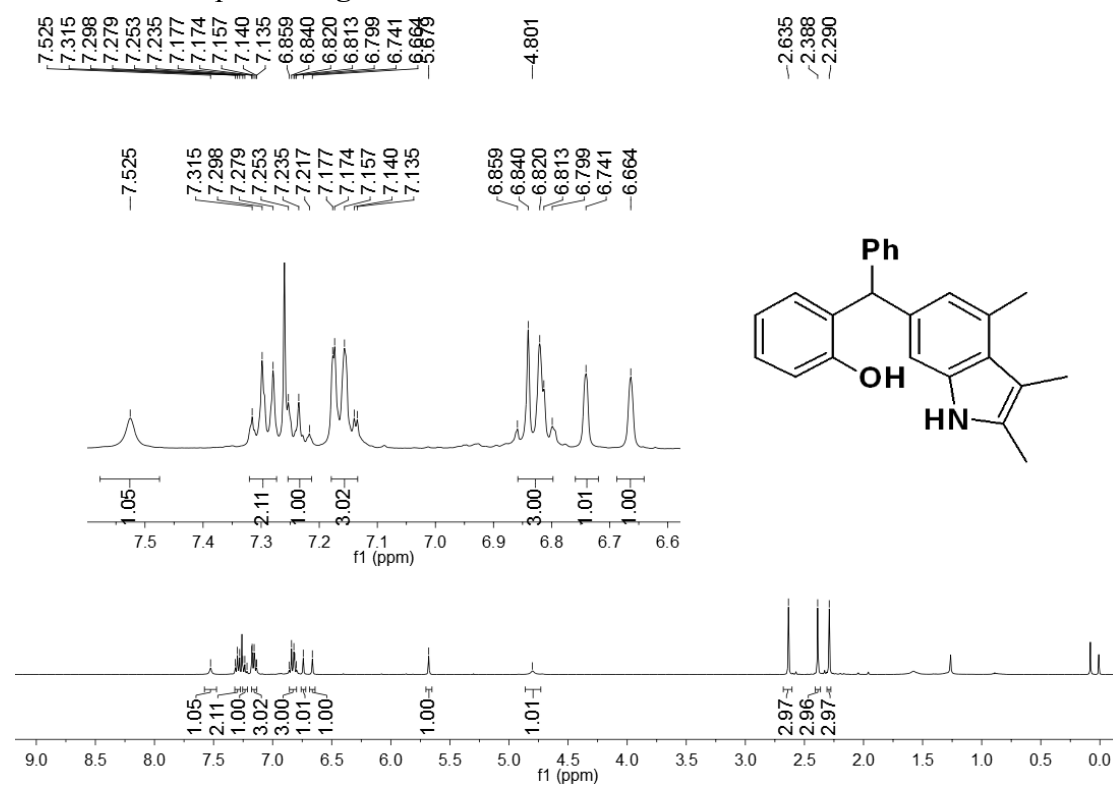

### <sup>13</sup>C NMR of compound **3ag**

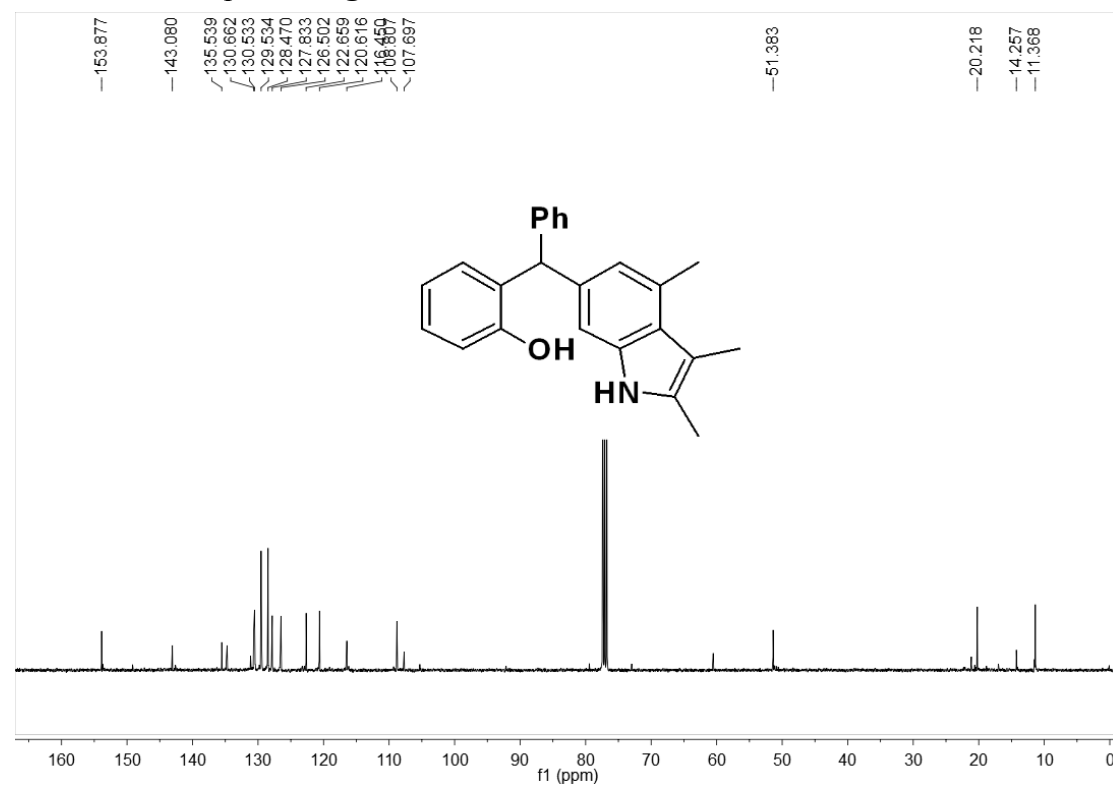

### <sup>1</sup>H NMR of compound **3ah**

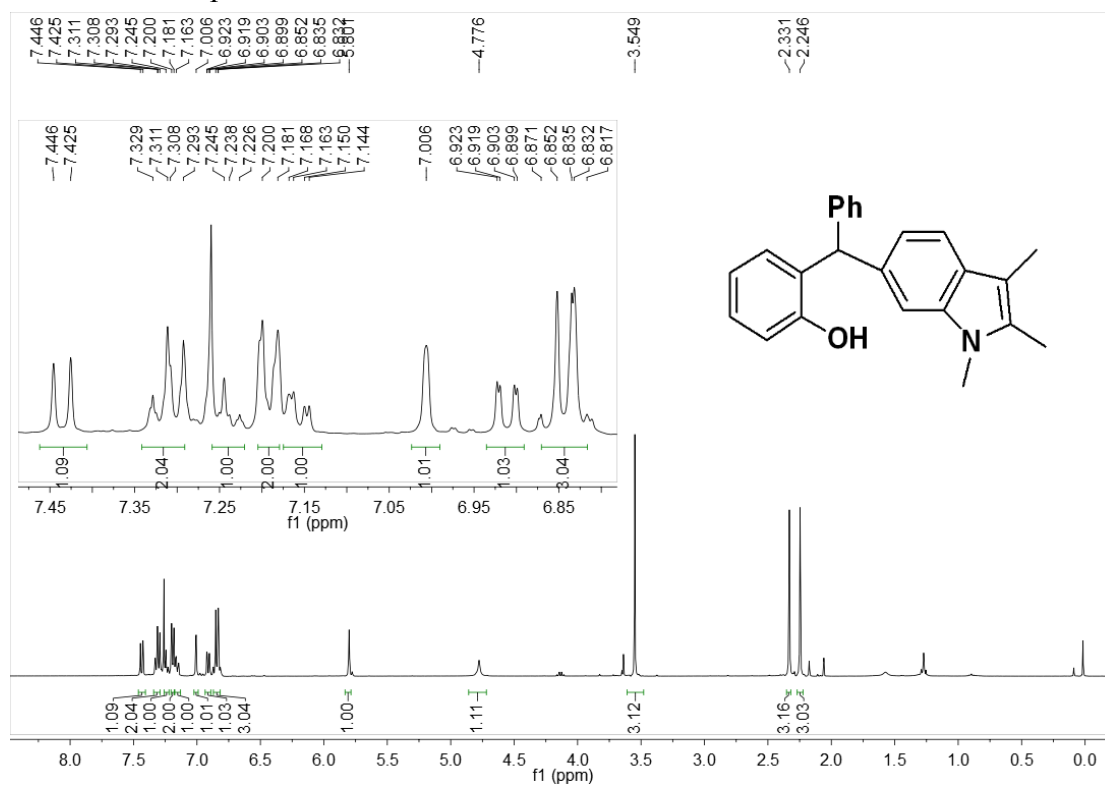

### <sup>13</sup>C NMR of compound **3ah**

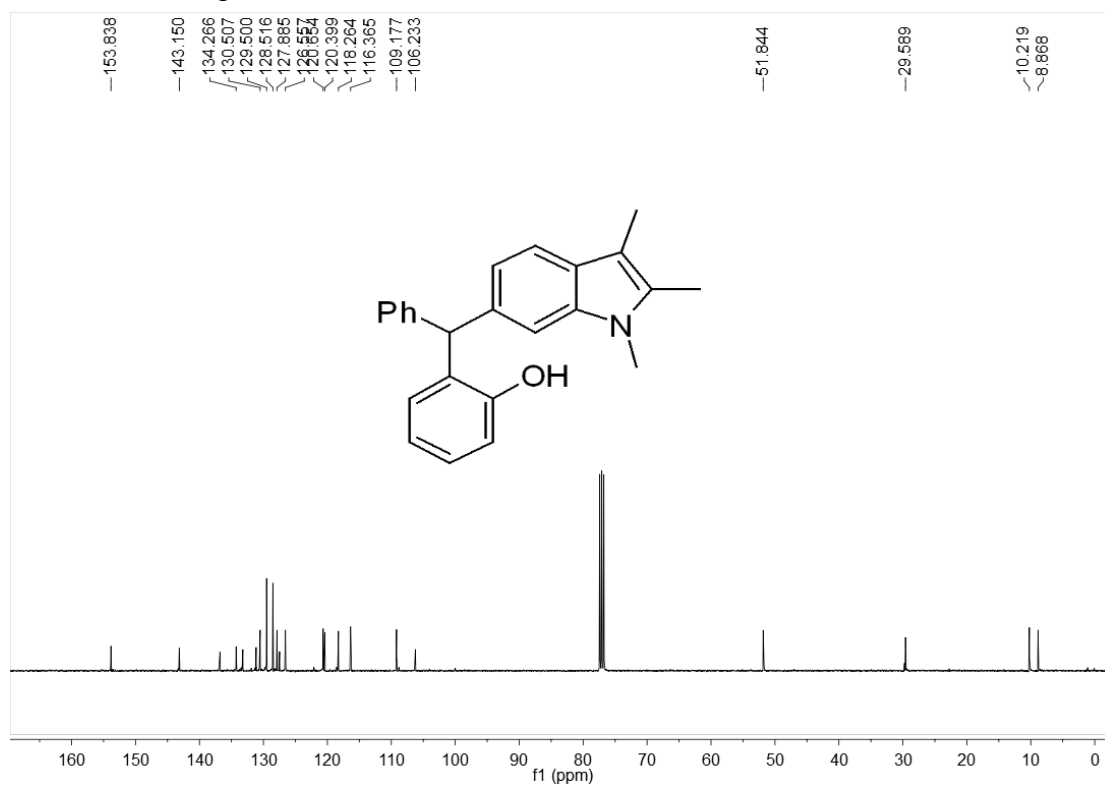

## 2. HPLC spectra of product 3aa

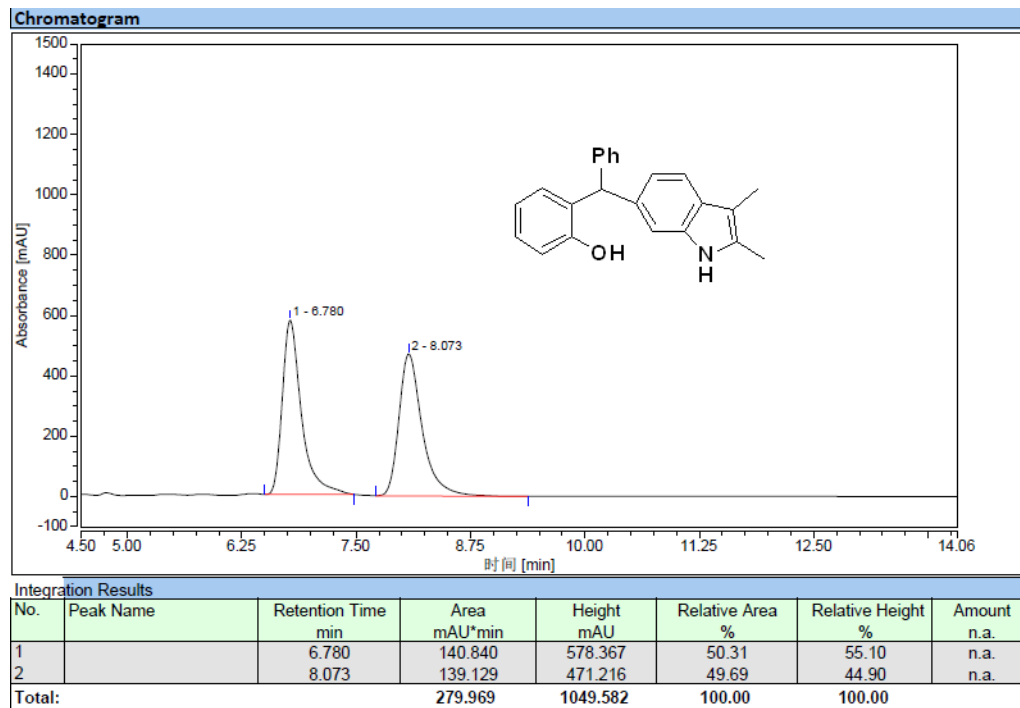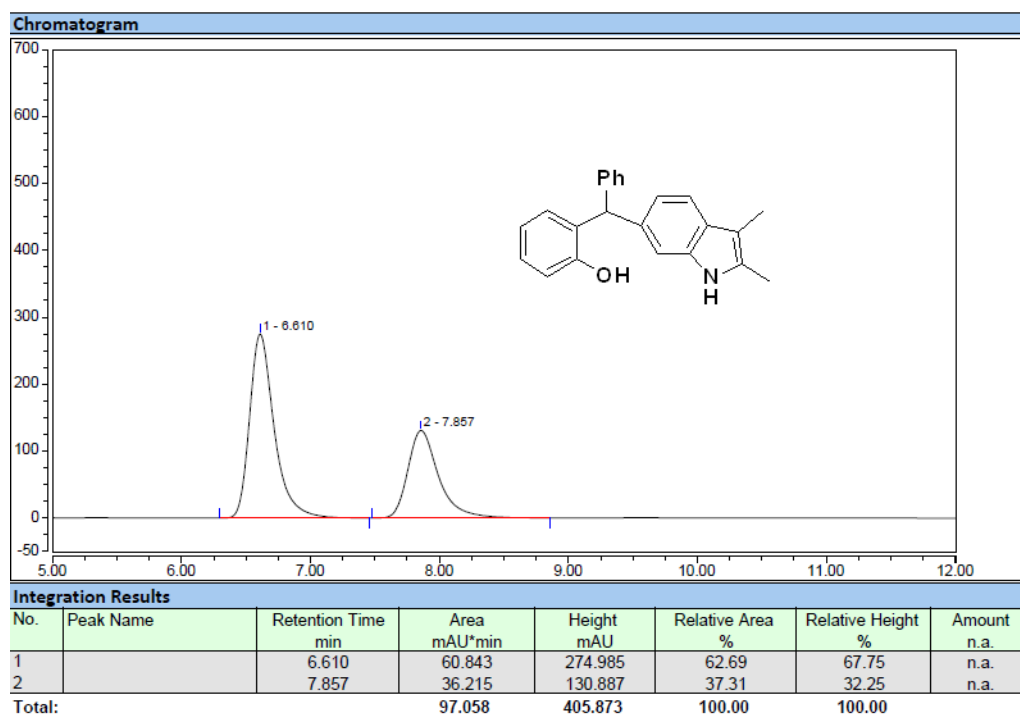



### 3. X-ray single crystal data for compound 3ae

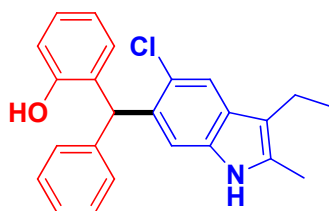

3ae

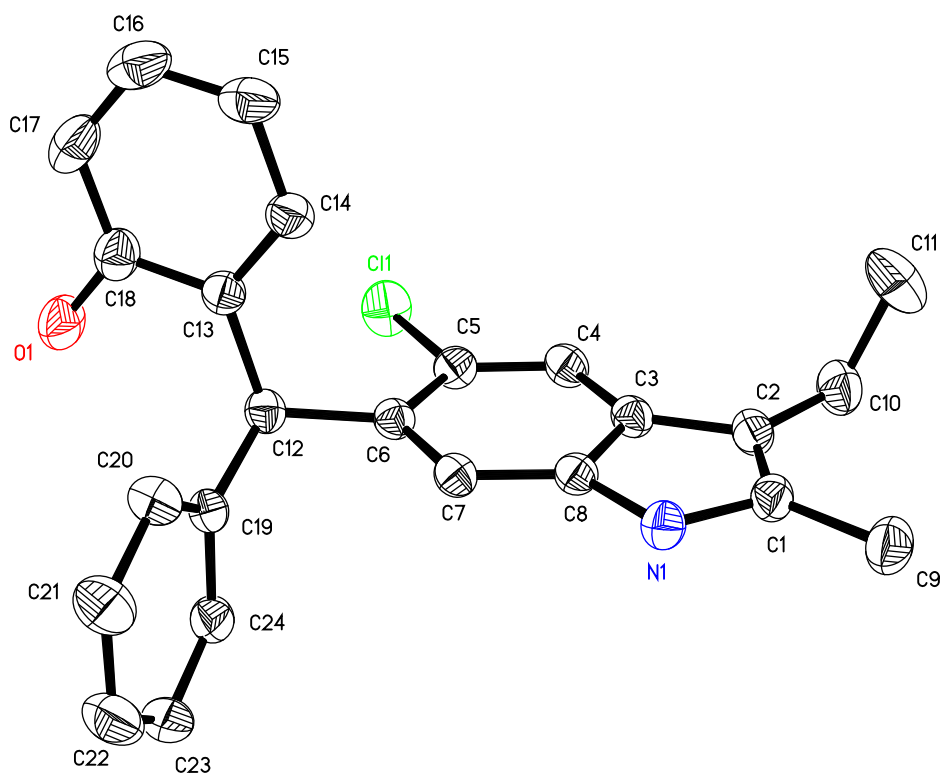

The thermal ellipsoid was drawn at the 30% probability level.

|                      |                                                                      |
|----------------------|----------------------------------------------------------------------|
| Empirical formula    | C <sub>24</sub> H <sub>22</sub> Cl N O                               |
| Formula weight       | 375.87                                                               |
| Temperature          | 296 K                                                                |
| Wavelength           | 0.71073 Å                                                            |
| Crystal system       | Monoclinic                                                           |
| Space group          | C 1 2/c 1                                                            |
| Unit cell dimensions | a = 17.424(3) Å      α = 90°<br>b = 12.100(2) Å      β = 101.189(4)° |

|                                        |                                                              |                       |
|----------------------------------------|--------------------------------------------------------------|-----------------------|
|                                        | $c = 19.028(3) \text{ \AA}$                                  | $\gamma = 90^\circ$ . |
| Volume                                 | $3935.4(12) \text{ \AA}^3$                                   |                       |
| Z                                      | 8                                                            |                       |
| Density (calculated)                   | $1.269 \text{ Mg/m}^3$                                       |                       |
| Absorption coefficient                 | $0.207 \text{ mm}^{-1}$                                      |                       |
| F(000)                                 | 1584                                                         |                       |
| Crystal size                           | $0.25 \times 0.2 \times 0.15 \text{ mm}^3$                   |                       |
| Theta range for data collection        | $2.062 \text{ to } 30.714^\circ$ .                           |                       |
| Index ranges                           | $-16 \leq h \leq 25, -17 \leq k \leq 17, -27 \leq l \leq 26$ |                       |
| Reflections collected                  | 19722                                                        |                       |
| Independent reflections                | 6111 [R(int) = 0.0432]                                       |                       |
| Completeness to theta = $25.242^\circ$ | 100.0 %                                                      |                       |
| Absorption correction                  | Semi-empirical from equivalents                              |                       |
| Max. and min. transmission             | 0.7461 and 0.6912                                            |                       |
| Refinement method                      | Full-matrix least-squares on $F^2$                           |                       |
| Data / restraints / parameters         | 6111 / 0 / 257                                               |                       |
| Goodness-of-fit on $F^2$               | 1.000                                                        |                       |
| Final R indices [ $I > 2\sigma(I)$ ]   | $R1 = 0.0478, wR2 = 0.1126$                                  |                       |
| R indices (all data)                   | $R1 = 0.1218, wR2 = 0.1450$                                  |                       |
| Extinction coefficient                 | n/a                                                          |                       |
| Largest diff. peak and hole            | $0.181 \text{ and } -0.307 \text{ e.\AA}^{-3}$               |                       |
